# 1 The chaperone-client network subordinates cell-cycle entry to growth and stress

2 David F. Moreno<sup>1,†</sup>, Eva Parisi<sup>1,†</sup>, Galal Yahya<sup>1,2,†</sup>, Federico Vaggi<sup>3</sup>, Attila Csikász-Nagy<sup>4,5,\*</sup>, Martí Aldea<sup>1,6,\*</sup>

3 <sup>1</sup> Molecular Biology Institute of Barcelona (IBMB), CSIC, 08028 Barcelona, Catalonia, Spain

4 <sup>2</sup> Department of Microbiology and Immunology, Zagazig University, Zagazig, Egypt

5 <sup>3</sup> Department of Informatics, Ecole Normale Supérieure, INRIA, Sierra Team, Paris Cedex 05, France

6 <sup>4</sup> Randall Division of Cell and Molecular Biophysics and Institute of Mathematical and Molecular Biomedicine, King's  
7 College London, London SE1 1UL, UK

8 <sup>5</sup> Pázmány Péter Catholic University, Faculty of Information Technology and Bionics, 1083 Budapest, Hungary

9 <sup>6</sup> Department of Basic Sciences, Universitat Internacional de Catalunya, 08195 Sant Cugat del Vallès, Spain

10 † These authors contributed equally to this work

11 \* Corresponding authors: [attila.csikasz-nagy@kcl.ac.uk](mailto:attila.csikasz-nagy@kcl.ac.uk) and [marti.aldea@ibmb.csic.es](mailto:marti.aldea@ibmb.csic.es)

12

13

## 14 Abstract

15 The precise coordination of growth and proliferation has a universal prevalence in cell homeostasis. As a  
16 prominent property, cell size is modulated by the coordination between these processes in bacterial,  
17 yeast and mammalian cells, but the underlying molecular mechanisms are largely unknown. Here we  
18 show that multifunctional chaperone systems play a concerted and limiting role in cell-cycle entry,  
19 specifically driving nuclear accumulation of the G1 Cdk-cyclin complex. Based on these findings, we  
20 establish and test a molecular competition model that recapitulates cell-cycle-entry dependence on  
21 growth rate. As key predictions at a single-cell level, we show that availability of the Ydj1 chaperone and  
22 nuclear accumulation of the G1 cyclin Cln3 are inversely dependent on growth rate and readily respond  
23 to changes in protein synthesis and stress conditions that alter protein folding requirements. Thus,  
24 chaperone workload would subordinate Start to the biosynthetic machinery and dynamically adjust  
25 proliferation to the growth potential of the cell.

26

27 **Keywords:** cell cycle; cell size; chaperone; cyclin; growth rate; stress, molecular competition; Start

28

## 29 INTRODUCTION

30 Under unperturbed conditions of growth cells maintain their size within constant limits, and different  
31 pathways have concerted roles in processes leading to growth and proliferation (Cook & Tyers, 2007;  
32 Marshall *et al*, 2012; Turner *et al*, 2012). Here we will use the term growth to refer to cell mass or volume  
33 increase, while the term proliferation will be restricted to the increase in cell number. Cell growth is  
34 dictated by many environmental factors in budding yeast, and the rate at which cells grow has profound  
35 effects on their size. High rates of macromolecular synthesis promote growth and increase cell size.  
36 Conversely, conditions that reduce cell growth limit macromolecular synthesis and reduce cell size. This  
37 behavior is nearly universal and it has been well characterized in bacteria, yeast, diatoms, and  
38 mammalian cells of different origins (Aldea *et al*, 2017). A current view sustains that cell cycle and cell  
39 growth machineries should be deeply interconnected to ensure cell homeostasis and adaptation, but the  
40 causal molecular mechanism is still poorly understood (Lloyd, 2013).

41 In budding yeast, cyclin Cln3 is the most upstream activator of Start (Tyers *et al*, 1993). Cln3 forms a  
42 complex with Cdc28, the cell cycle Cdk in budding yeast, and activates the G1/S regulon with the  
43 participation of two other G1 cyclins, Cln1 and Cln2, which contribute to phosphorylate the Whi5  
44 inhibitor thus creating a positive feedback loop that provides Start with robustness and irreversibility  
45 (Bertoli *et al*, 2013). The Start network in mammals offers important differences, particularly in the  
46 structure and number of transcription factors, but the core of the module is strikingly similar, where  
47 Cdk4,6-cyclin D complexes phosphorylate RB and activate E2F-DP transcription factors in a positive  
48 feedback loop involving Cdk2-cyclin E (Bertoli *et al*, 2013).

49 As they are intrinsically unstable, G1 cyclins are thought to transmit growth information for adapting cell  
50 size to environmental conditions. The Cln3 cyclin is a dose-dependent activator of Start (Sudbery *et al*,  
51 1980; Nash *et al*, 1988; Cross & Blake, 1993) that accumulates in the nucleus due to a constitutive C-  
52 terminal NLS (Edgington & Futcher, 2001; Miller & Cross, 2001) and the participation of Hsp70-Hsp40  
53 chaperones, namely Ssa1,2 and Ydj1 (Vergés *et al*, 2007). In addition, Ssa1 and Ydj1 also regulate Cln3  
54 stability (Yaglom *et al*, 1996; Truman *et al*, 2012), and play an essential role in setting the critical size as a  
55 function of growth rate (Ferrezuelo *et al*, 2012). In mammalian cells cyclin D1 depends on Hsp70  
56 chaperone activity to form trimeric complexes with Cdk4 and NLS-containing KIP proteins (p21, p27, p57)  
57 that drive their nuclear accumulation (Diehl *et al*, 2003).

58 Molecular chaperones assist nascent proteins in acquiring their native conformation and prevent their  
59 aggregation by constraining non-productive interactions. These specialized folding factors also guide

60 protein transport across membranes and modulate protein complex formation by controlling  
61 conformational changes (Kampinga & Craig, 2010). Chaperones are involved in key growth-related  
62 cellular processes as protein folding and membrane translocation during secretion (Kim *et al*, 2013), and  
63 many chaperone-client proteins have crucial roles in the control of growth, cell division, environmental  
64 adaptation and development (Gong *et al*, 2009; Taipale *et al*, 2012, 2014). Thus, since chaperones  
65 required for Cdk-cyclin activation are also involved in the vast majority of processes underlying cell  
66 growth, we hypothesized that competition for shared multifunctional chaperones could subordinate  
67 entry into the cell cycle to the biosynthetic machinery of the cell.

68 Here we show that chaperones play a concerted and limiting role in cell-cycle entry, specifically driving  
69 nuclear accumulation of the G1 Cdk-cyclin complex. Ydj1 availability is inversely dependent on growth  
70 rate and, based on our findings, we have established a molecular competition model that recapitulates  
71 cell-cycle entry dependence on growth rate. As key predictions of the model, we show that nuclear  
72 accumulation of the G1 cyclin Cln3 is negatively affected by growth rate in a chaperone-dependent  
73 manner, and rapidly responds to conditions that perturb or boost chaperone activity. Thus chaperone  
74 availability would act as a G1-Cdk modulator transmitting both intrinsic and extrinsic information to  
75 subordinate Start and the critical size to the growth potential of the cell.

76

## 77 **RESULTS**

### 78 **Nuclear accumulation of the G1 Cdk depends on chaperone activity**

79 Cln3 contains a bipartite nuclear localization signal at its C terminus that is essential for timely entry into  
80 the cell cycle (Edgington & Futcher, 2001; Miller & Cross, 2001), and we had found that the Ydj1  
81 chaperone is important for nuclear accumulation of Cln3 (Vergés *et al*, 2007) and for setting the critical  
82 size as a function of growth rate (Ferrezuelo *et al*, 2012). Thus, we decided to characterize the role of  
83 chaperones as regulators of the G1 Cdk during G1 progression at a single-cell level in time-lapse  
84 experiments. Cln3 is too short-lived to be detected as a fluorescent-protein fusion in single cells unless  
85 stabilized mutants are used (Liu *et al*, 2015; Schmoller *et al*, 2015). As previously described, mCitrine-  
86 Cln3-11A displayed a distinct nuclear signal in most asynchronously growing cells, arguing against the ER  
87 retention mechanism that we had proposed previously (Vergés *et al*, 2007). However, this protein is  
88 much more stable compared to wild-type Cln3, and transient retention at the ER would likely be obscured  
89 by accumulation of abnormally stable mCitrine-Cln3-11A in the nucleus. Thus, we decided to test whether  
90 nuclear accumulation of this stabilized protein was still dependent on Ydj1 by carefully measuring nuclear

91 and cytoplasmic fluorescence levels (Fig EV1). While overall levels as determined by immunoblotting  
92 were not altered, nuclear mCitrine-Cln3-11A levels strongly decreased in Ydj1-deficient cells (Fig 1A-C),  
93 which confirmed previous observations obtained with 3HA-tagged wild-type Cln3 by  
94 immunofluorescence (Vergés *et al*, 2007). Moreover, while nuclear levels of Cdc28-GFP in late G1 cells  
95 were also negatively affected by deletion of *YDJ1*, overexpression of both Ydj1 and Ssa1 significantly  
96 increased the nuclear to cytoplasmic ratio of Cdc28-GFP both in mid- and late-G1 cells (Fig 1D). Likely due  
97 to the fact that Cdc28 is present at much higher levels than Cln3 (Tyers *et al*, 1993; Cross *et al*, 2002)  
98 differences in the steady-state nuclear levels of Cdc28 when comparing wild-type and Ydj1-deficient or  
99 overexpressing cells were only modest (Fig 1D). On the other hand, we cannot discard the effects of  
100 Cln1,2 cyclins synthesized at Start by the transcriptional feedback loop. Thus, we decided to analyze  
101 directly the import kinetics of Cdc28-GFP in G1 cells by nuclear FLIP (Figs 1E,F and EV2). We found that,  
102 while being extremely dependent on Cln3 (Fig 1G), the nuclear import rate of Cdc28-GFP decreased in  
103 Ydj1-deficient cells and was clearly impaired when chaperone function was compromised by azetidine 2-  
104 carboxylic acid (AZC), a proline analog that interferes with proper protein folding (Trotter *et al*, 2001). By  
105 contrast, a 2NLS-GFP control did not show significant differences in nuclear localization or import kinetics  
106 in cells lacking Ydj1, Cln3 or in the presence of AZC (Fig 1C and H). These data are consistent with a  
107 chaperone-dependent mechanism that drives nuclear import of the Cdc28-Cln3 complex in G1 for the  
108 timely execution of Start.

109

### 110 **Multifunctional chaperones have a limiting role in setting cell size at budding**

111 If chaperones have a role in coordinating cell growth and Start machineries, chaperone availability ought  
112 to be limiting for cell-cycle entry. Thus, we decided to test this proposition by increasing the gene dosage  
113 of different chaperone sets in low-copy centromeric vectors. In addition to the Hsp70 system (Ssa1 and  
114 Ydj1), we analyzed the effects of key components of the Hsp90 system (Hsc82 and Cdc37), which is  
115 important for holding the Cdk in a productive conformation for binding cyclins (Vaughan *et al*, 2006), and  
116 the segregase Cdc48 complex (Cdc48, Ufd1, and Npl4), which prevents degradation of ubiquitinated Cln3,  
117 and concurrently stimulates its ER release and nuclear accumulation to trigger Start (Parisi *et al*, 2018).  
118 Gene duplication in centromeric vectors increased chaperone gene expression by 1.5- to 2-fold in a  
119 specific manner (Fig EV3A). Notably, although expression levels increased only modestly, additional  
120 copies of chaperone genes caused an additive reduction of the budding volume in asynchronous cultures  
121 (Fig 2A) and newborn daughter cells (Fig 2B). This effect was barely observed in large cells deficient for  
122 Cln3, and was totally abolished in cells lacking Cln3 as well as Whi5 and Stb1, two key inhibitors of the

123 Start network (Fig 2B). This triple mutant displays unaltered average budding volume compared to wild  
124 type (Wang *et al*, 2009), but has lost most of the dependency on growth rate (Ferrezuelo *et al*, 2012). In  
125 contrast, the effect was still clear in cells lacking Whi7, an inhibitor of Start that acts at an upstream step  
126 (Yahya *et al*, 2014). Finally, we observed a comparable reduction of the budding volume when genes of  
127 the three chaperone systems were duplicated together in an artificial chromosome (Fig 2C). Doubling  
128 times of cells with vectors expressing the different chaperone sets were not significantly different from  
129 wild-type cells. Also, we had found no differences in the growth rate during G1 when comparing wild-  
130 type and Ydj1/Ssa1 overexpressing cells (Ferrezuelo *et al*, 2012), which rules out indirect effects on cell  
131 size by growth rate changes. In addition, protein levels and phosphorylation status of Cln3 were not  
132 affected by chaperone gene dosage (Fig EV3B), pointing to a limiting role of these chaperone sets in Cdk-  
133 cyclin complex activity and/or localization.

134

### 135 **Molecular competition for chaperones predicts cell size dependency on growth rate**

136 As they are associated with client proteins mostly in a transient manner, the level of free chaperones  
137 might be inversely dependent on protein synthesis and trafficking rates, thus constituting a simple  
138 mechanism to report growth kinetics to the Start network and, hence, modulate cell size as a function of  
139 growth rate. To test this notion, we developed a mathematical model (Fig 3A) wherein protein synthesis  
140 and G1 Cdk-cyclin complex assembly compete for limiting amounts of Ydj1, the best characterized  
141 chaperone in terms of regulating Cln3. Ydj1 plays an activating role by releasing Cln3 from the ER during  
142 G1 (Vergés *et al*, 2007), but is also important for efficient degradation of Cln3 by Cdc28-dependent and  
143 autoactivated phosphorylation (Yaglom *et al*, 1996, 1995). Taken together, these data point to the notion  
144 that Ssa1/Ydj1 chaperones contribute to both proper Cln3 folding (i.e. binding Cdc28 in a productive  
145 conformation) and its release from the ER where the segregase Cdc48 plays also a key role (Parisi *et al*,  
146 2018). Since these regulatory steps are likely related at the molecular level, we opted for treating them as  
147 a single event in the competition model. On another point, although the specific affinity of Ydj1 for the  
148 various Cln3 domains was similar to other proteins (Fig EV4), the number of client proteins being  
149 synthesized at any given time is in overwhelming excess relative to those of Ydj1 (Gong *et al*, 2009) and  
150 especially of Cln3, which is present at very low levels (Tyers *et al*, 1993; Cross *et al*, 2002).

151 In our model, the level of available, unbound Ydj1 (Ydj1<sub>A</sub>) is a key variable and, since client-engaged  
152 chaperones offer a reduced mobility (Lajoie *et al*, 2012; Saarikangas *et al*, 2017), we decided to use FLIP  
153 and FCS to obtain a mobility index of fully functional Ydj1 and Ssa1 fusions to GFP as reporter of their

154 availability in single cells. First we tested the validity of this methodological approach by compromising  
155 chaperone function with AZC, which induces misfolded protein accumulation with chaperones into  
156 disperse cellular aggregates (Escusa-Toret *et al*, 2013), thus reducing levels of soluble available  
157 chaperones. While GFP mobility remained unaffected, both Ssa1 and Ydj1 fusions to GFP decreased their  
158 mobility upon AZC treatment (Fig EV5).

159 Individual genetically-identical cells display a large variability in multifactorial processes such as gene  
160 expression and growth (Blake *et al*, 2003; Ferrezuelo *et al*, 2012) and we reasoned that, if the molecular  
161 competition model is correct, endogenous variability in growth rate should have an effect on chaperone  
162 availability at the single-cell level. We found that Ydj1-GFP diffusion was correlated negatively with  
163 growth rate in single G1 cells by both FLIP (Fig 3C and D) and FCS (Fig 3E and F) analysis, and at a  
164 population level in media sustaining different growth rates (Fig EV6A). The chaperone-competition model  
165 perfectly fitted the dependence of Ydj1 availability on growth rate (Fig 3F) and, more important, it also  
166 simulated very closely the increase of the budding volume with growth rate (Ferrezuelo *et al*, 2012) (Fig  
167 3G). As expected from a competition framework, the fitted parameter sets produced negative  
168 correlations between available Ydj1 and unfolded target proteins (Fig EV6B), and a positive correlation  
169 between the level of Ydj1 in complexes with either Cln3 or all other proteins (Fig EV6C). Interestingly, the  
170 competition model produced acceptable fits with parameters spanning several orders of magnitude (Fig  
171 3B), which underlines the robustness of the chaperone competition design in predicting growth-rate  
172 dependent chaperone availability and cell size, letting parameters to be adapted for subjugating Start to  
173 cellular processes other than growth. In summary, our experimental results and modeling simulations  
174 support the notion that growth rate modulates levels of available chaperones.

175

## 176 **Growth rate and protein synthesis modulate accumulation of Cln3 in the nucleus**

177 The molecular competition model predicted that increasing growth rate would decrease available levels  
178 of free chaperones (Ydj1<sub>A</sub>) and, hence, decrease the steady-state level of folded free Cln3 (Cln3<sub>F</sub>) (Fig  
179 EV6D and E). More precisely, the fraction of Ydj1 bound to client proteins (YP+YC) increases at higher  
180 growth rates. As a consequence, the fraction of available free Ydj1 (Ydj1<sub>A</sub>) drops and the rate at which  
181 proteins can be folded is reduced, which in turn increases the fraction of unfolded proteins (Prot<sub>U</sub> and  
182 Cln3<sub>U</sub>). Due to its intrinsic instability, folded Cln3 (Cln3<sub>F</sub>) levels are extremely more sensitive to the effects  
183 of Ydj1 compared to all other proteins. Indeed, whereas the total concentration of mCitrine-Cln3-11A in  
184 G1 remained unaltered on average at different growth rates (Fig EV6G), nuclear levels of mCitrine-Cln3-

185 11A displayed a significant negative correlation ( $p=2.10^{-4}$ ) with growth rate very similar to that predicted  
186 by the model (Fig 3H). Notably, this negative correlation was totally lost in Ydj1-deficient cells (Fig 3H). In  
187 summary, higher growth rates reduce the nuclear levels of Cln3 at a given volume in a chaperone-  
188 dependent manner.

189 Next, with the purpose of simulating lower growth rates, we used cycloheximide (CHX) to decrease  
190 protein synthesis and relieve chaperones temporarily from the load of nascent polypeptides (Fig 4A and  
191 B). As expected, CHX inhibited incorporation of puromycin in cell-free extracts (Fig 4C) but it increased  
192 the rate at which heat-treated luciferase was renatured and became active, indicating that both protein  
193 refolding and synthesis compete for chaperones in cell extracts. Next, we tested the effects of CHX at 0.2  
194  $\mu\text{g/ml}$ , a sublethal concentration that does not activate the environmental stress response (Jacquet,  
195 2003; Trotter *et al*, 2002), and found that the protein synthesis rate displayed a 5.9-fold decrease in live  
196 cells (Fig EV7). In agreement with our model prediction (Fig 4B) this sublethal dose of CHX increased the  
197 average diffusion coefficient of Ydj1-GFP as measured by FCS (Fig 4D) and FLIP (Fig 4E). Temporary  
198 perturbations of chaperone availability should in turn have an effect in the nuclear accumulation of Cln3  
199 (Fig 4B). In order to quantify endogenously expressed Cln3-3HA in immunofluorescence images we used a  
200 semiautomated method that analyzes both cytoplasmic and nuclear compartments in fixed yeast cells  
201 (Yahya *et al*, 2014). Notably, we found that relative nuclear levels of Cln3-3HA rapidly increased after  
202 addition of CHX (Fig 4F and G), decreasing at later times as predicted by the model (Fig 4B), and this  
203 transient increase fully depended on Ydj1. However, CHX has been shown to increase cell size at Start  
204 (Jorgensen *et al*, 2004). This apparent discrepancy could originate from the different short- and long-term  
205 effects of CHX, i.e. increasing Ydj1 mobility and nuclear localization of Cln3 at very short times (less than  
206 one minute), but eventually decreasing G1 cyclin levels, which is what would finally result in a larger cell  
207 size. In the overall, these data support the notion that chaperone availability transmits growth and  
208 protein synthesis rate information to modulate the rate at which the G1 Cdk-cyclin complex is properly  
209 formed and accumulates in the nucleus.

210

### 211 **Stress conditions that decrease chaperone availability prevent accumulation of Cln3 in the nucleus**

212 Yeast cells respond to stress conditions as diverse as high temperature, high osmolarity or abnormal  
213 levels of unfolded proteins in the ER, by highly conserved transcriptional programs that increase  
214 chaperone expression to protect damaged proteins from aggregation, unfold aggregated proteins, and  
215 refold damaged proteins or target them for efficient degradation (De Nadal *et al*, 2011). Thus, stresses

216 are assumed to cause a temporary deficit in chaperone availability. Hsf1, the key transcriptional activator  
217 of the heat shock response, is inhibited by chaperones of the Hsp70 and Hsp90 systems, and it has been  
218 proposed that the accumulation of unfolded or damaged proteins would readily titrate the chaperone  
219 machinery from Hsf1, allowing derepression of the transcription factor (Verghese *et al*, 2012). Supporting  
220 this notion, Ydj1-assisted Ssa1 chaperone is targeted to and accumulates in protein aggregates (Mogk *et al*,  
221 2018) after heat stress. A similar titration mechanism has been proposed for Kar2, the Hsp70  
222 chaperone acting at the ER lumen (Gardner *et al*, 2013). On the other hand, both heat and salt stress  
223 have been shown to inhibit the G1/S regulon (Rowley *et al*, 1993; Bellí *et al*, 2001; Trotter *et al*, 2001).  
224 Thus, we reasoned that chaperone titration by stress could effectively reduce chaperone availability and  
225 restrain nuclear accumulation of Cln3 in a temporary manner (Fig 5A). We first interrogated our model  
226 and simulated a stress event by transferring different fractions of the folded protein ( $Prot_F$ ) to the  
227 unfolded population ( $Prot_U$ ). As shown in Fig 5B, the model predicted a sharp and transient reduction in  
228 available Ydj1 ( $Ydj1_A$ ) and free Cln3 ( $Cln3_F$ ). Notably, we found that Ydj1-GFP diffusion decreased very  
229 rapidly under both heat and salt stress (Fig 5C and D), and recovered at later times to attain similar  
230 steady-states to the pre-stress situation. Moreover, nuclear levels of Cln3-3HA displayed a similar and  
231 transient decrease after heat and salt stress (Fig 5E and F), which did not affect overall Cln3-3HA levels as  
232 measured by immunoblotting. Due to its extremely short half-life, Cln3 is thought to respond very rapidly  
233 to new conditions. However, nuclear levels of Cln3 only recovered pre-stress values after 20-30 min (Fig  
234 5G and H), within the same time range needed by the Ydj1 chaperone to recover pre-stress mobility (Fig  
235 5C and D), thus reinforcing a functional link between chaperone availability and nuclear accumulation of  
236 Cln3 under stress conditions. To test this further, we used our model to predict the behavior of Cln3  
237 during stress adaptation assuming that overall protein folding and nuclear accumulation of Cln3 use  
238 chaperones in independent or competing manners. As seen in Fig 5G and H, only the competition  
239 scenario was able to recapitulate the Cln3 immunofluorescence data from both heat and salt stresses.

240 ER stress causes protein aggregation in the cytoplasm (Hamdan *et al*, 2017), and increases Ssa4  
241 expression to levels very similar to Kar2 (Travers *et al*, 2000), suggesting that ER stress also affects Ydj1  
242 availability. Moreover, ER stress also causes a G1 delay (Vai *et al*, 1987). We found that, similar to heat  
243 and salt stress, addition of tunicamycin to induce irreversible ER stress in yeast cells decreased Ydj1  
244 mobility and nuclear levels of Cln3-3HA (Fig EV8). Overall, these data indicate that stress conditions due  
245 to very different environmental cues cause coincident decreases in Ydj1 mobility and Cln3 nuclear  
246 accumulation, reinforcing the notion that chaperone availability is a key parameter that controls G1 cyclin  
247 fate and adapts cell-cycle entry to growth and stress.



## 248 **DISCUSSION**

249 Our data show that multifunctional chaperone systems play a limiting role in driving nuclear  
250 accumulation of the Cdc28-Cln3 complex during G1 progression. We also show that increased growth  
251 rates, by allocating higher levels of chaperones to protein synthesis and trafficking, reduce free  
252 chaperone pools and restrain nuclear accumulation of Cln3 at a given volume in G1. If Cln3 has to reach a  
253 threshold concentration to execute Start (Wang *et al*, 2009; Schmoller *et al*, 2015; Liu *et al*, 2015), fast  
254 growing cells would delay G1 progression to grow larger and attain the same pool of free chaperones and  
255 nuclear Cln3 (Fig 6). As a consequence, the critical size would be set as a function of growth rate. Due to  
256 the close molecular connection proposed here between protein synthesis and folding/release of the G1  
257 cyclin, our model would allow cells to quickly adjust their size to many different intrinsic and extrinsic  
258 signals as long as they modulate protein synthesis, thus acting as a common mediator of specific growth  
259 signaling pathways and the Start network. This view would also explain, at least in part, why deleterious  
260 mutations in nutrient sensing pathways that control ribosome biogenesis and cell growth cause a small  
261 cell size phenotype (Jorgensen *et al*, 2004; Baroni *et al*, 1994; Tokiwa *et al*, 1994). A recent  
262 comprehensive analysis of cell size mutants concluded that, in the majority of *whi* mutants, the small cell  
263 size was due to indirect effects mostly caused by a decrease in growth rate (Soifer & Barkai, 2014).

264 The chaperone competition mechanism would only operate above a minimal translation rate to sustain  
265 G1-cyclin synthesis (Schneider *et al*, 2004), and would collaborate with pathways regulating G1-cyclin  
266 expression by specific nutrients (Baroni *et al*, 1994; Newcomb *et al*, 2002; Gallego *et al*, 1997; Tokiwa *et al*,  
267 1994). In this respect, Cln3 synthesis is strongly downregulated at low growth rates by a uORF-  
268 dependent mechanism (Polymenis & Schmidt, 1997), shifting cells from poor to rich carbon sources  
269 increases Cln3 abundance but yet delays Start in terms of cell size (Johnston *et al*, 1979; Hall *et al*, 1998;  
270 Tokiwa *et al*, 1994), phosphate deprivation increases degradation of Cln3 by Pho85-dependent  
271 phosphorylation (Menoyo *et al*, 2013), and Rim15 counteracts Whi5 dephosphorylation in G1 to facilitate  
272 cell-cycle entry in poor carbon sources (Talarek *et al*, 2017). Moreover, nutrient modulation of cell size is  
273 largely independent of the core components of the Start network (Jorgensen *et al*, 2004). From this point  
274 of view, modulation of the critical cell size threshold by nutrients and growth rate has remained a  
275 mysterious issue during decades (Johnston *et al*, 1979; Tyson *et al*, 1979; Fantes & Nurse, 1977). Our  
276 findings provide a general mechanism to modulate nuclear accumulation of Cln3 and cell-cycle entry as a  
277 function of growth rate.

278 Cells deficient for Cln3 still maintain a growth-rate dependent size at Start, but with a much larger  
279 variability compared to wild type cells (Yahya *et al*, 2014). Cln1 and Cln2 become essential in the absence  
280 of Cln3, and cells lacking these two other G1 cyclins also display a wider range of sizes at Start as a  
281 function of growth rate. Moreover, the *CLN2* mRNA has also been found enriched in Whi3 pulldowns  
282 (Colomina *et al*, 2008; Holmes *et al*, 2013), suggesting that the chaperone competition mechanism would  
283 also apply to Cln2, particularly in the absence of Cln3.

284 Whi5 levels have been found to decrease in rich carbon sources (Liu *et al*, 2015). If these modulation was  
285 responsible for cell size adaptation, we should expect cells displaying the opposite behavior, i.e. cells  
286 should be smaller in rich carbon sources. However, this observation could be interpreted as an effect,  
287 rather than a causative determinant of cell size adaptation. Whi5 is synthesized in a size-independent  
288 manner (Schmoller *et al*, 2015) and, also likely, in a growth-rate independent manner. As cells growing in  
289 rich carbon sources are larger, this effect would produce a decrease in Whi5 concentration. Thus, while  
290 Whi5 would act as a growth rate independent sizer, chaperone availability would dynamically transmit  
291 growth rate information to modulate G1 Cdk activation and adjust cell size as a function of the individual  
292 growth potential (Fig 6).

293 Available models of the cell cycle of budding yeast have centered their attention to different aspects of  
294 the molecular machineries that execute and regulate key transitions, but the implications of growth rate  
295 on cell size have been addressed only in a few occasions. Thus, a model based on intrinsic size  
296 homeostasis predicts growth-rate dependence if nutrient uptake is subject to geometric constraints  
297 (Spiesser *et al*, 2012, 2015). In this regard, surface to volume ratios have been recently highlighted in  
298 bacteria as key parameters for setting cell size as a function of growth rate (Harris & Theriot, 2016).  
299 Interestingly, an important fraction of Ydj1 is involved in post-translational protein translocation at the ER  
300 (Caplan *et al*, 1992; McClellan *et al*, 1998) to fuel cell surface growth which, as a consequence, would set  
301 Ydj1 demands as a function of surface-to-volume ratios. On the other hand, in a recent model of the G1/S  
302 transition, it has been proposed that growth-rate dependence would be exerted, directly or indirectly, by  
303 ribosome-biogenesis effects on the Cln3/Whi5 interplay (Palumbo *et al*, 2016). In agreement with this  
304 idea, here we propose that chaperones act as key mediators in this pathway by modulating the ability of  
305 Cln3 to accumulate in the nucleus and, hence, attain a critical Cln3/Whi5 ratio.

306 Nutrient modulation of cell size also takes place during bud growth and, as we had observed in G1, cell  
307 size at birth displays a strong correlation with growth rate at a single cell level during the preceding S-G2-  
308 M phases (Leitao & Kellogg, 2017). Thus, mechanisms sensing growth rate independently of the specific  
309 nutritional conditions also operate during bud volume growth.

310 Finally, we show that different stress agents cause concurrent decreases in Ydj1 mobility and nuclear Cln3  
311 levels, supporting the idea that chaperone availability is a key factor controlling localization of the most  
312 upstream G1 cyclin and, hence, modulating G1 length under stress conditions. Heat shock transiently  
313 inhibits G1/S gene expression (Rowley *et al*, 1993), but the molecular mechanism is still unknown. On the  
314 other hand, osmotic shock causes a similar temporary repression of the G1/S regulon (Bellí *et al*, 2001),  
315 where Hog1-mediated phosphorylation of Whi5 and Msa1 plays an important role in transcription  
316 inhibition (González-Novo *et al*, 2015). However, G1/S gene expression was still repressed by salt in the  
317 absence of Whi5 and Msa1, indicating the existence of additional mechanisms sufficient to inhibit the  
318 G1/S regulon under osmotic shock. It has long been known that ER stress causes a G1 delay (Vai *et al*,  
319 1987), but the molecular mechanisms have not been described. Our results uncover a new mechanism  
320 that would explain the observed downregulation of G1/S genes by heat, salt and ER stress, whereby  
321 immediate titration of chaperones would decrease available pools of Ssa1 and Ydj1 chaperones required  
322 to accumulate the G1 Cdk in the nucleus for triggering Start. In this manner, stress conditions would delay  
323 G1 progression until proteostasis and chaperone availability recover to normal levels (Fig 6).

324 Free chaperone levels could also report growth capability to other processes influenced by growth rate  
325 (Brauer *et al*, 2008) or stressful conditions (De Nadal *et al*, 2011) through similar competition settings.  
326 Furthermore, imposing a high level of free chaperones as a requirement for Start would ensure their  
327 availability in highly-demanding downstream processes such as polarized growth for bud emergence or  
328 nucleosome remodeling during replication.

329

## 330 **MATERIALS AND METHODS**

### 331 **Strains and plasmids**

332 Yeast strains and plasmids used are listed in Supplementary Table 1. Parental strains and methods used  
333 for chromosomal gene transplacement and PCR-based directed mutagenesis have been described  
334 (Gallego *et al*, 1997; Ferrezuelo *et al*, 2012). Unless stated otherwise, all gene fusions in this study were  
335 expressed at endogenous levels at their respective loci. As C-terminal fusions of GFP or other tags has  
336 strong deleterious effects on Ydj1 function (Saarikangas *et al*, 2017), we inserted GFP at amino acid 387,  
337 between the dimerization domain and the C-terminal farnesylation sequence of Ydj1. This construct had  
338 no detectable effects on growth rate or cell volume when expressed at endogenous levels. The mCitrine-  
339 Cln3-11A fusion protein contains a hypoactive and hyperstable cyclin with 11 amino acid substitutions  
340 (R108A, T420A, S449A, T455A, S462A, S464A, S468A, T478A, S514A, T517A, T520A) that allows its

341 detection by fluorescence microscopy with no gross effects on cell cycle progression (Schmoller *et al*,  
342 2015).

### 343 **Growth conditions**

344 Cells were grown for 7-8 generations in SC medium with 2% glucose at 30°C before microscopy unless  
345 stated otherwise. Other carbon sources used were 2% galactose, 2% raffinose and 3% ethanol. GAL1p-  
346 driven gene expression was induced by addition of 2% galactose to cultures grown in 2% raffinose at  
347 OD<sub>600</sub>=0.5. When stated, 10 μM β-estradiol was used to induce the GAL1 promoter in strains expressing  
348 the Gal4-hER-VP16 (GEV) transactivator (Louvion *et al*, 1993). Azetidine 2-carboxylic acid (AZC) was used  
349 at 10 mM, and cycloheximide was added at a sublethal dose of 0.2 μg/ml that does not trigger stress  
350 gene activation (Jacquet, 2003; Trotter *et al*, 2002). Heat and osmotic stresses were imposed by  
351 transferring cells from 25°C to 37°C or adding 0.4M NaCl at 30°C, respectively. Tunicamycin was added  
352 used at 1 μg/ml. Small newly-born cells were isolated from Ficoll gradients (Mitchison, 1988).

### 353 **Time-lapse microscopy**

354 Cells were analyzed by time-lapse microscopy in 35-mm glass-bottom culture dishes (GWST-3522, WillCo)  
355 in SC-based media at 30°C essentially as described (Ferrezuelo *et al*, 2012) using a fully-motorized Leica  
356 AF7000 microscope. Time-lapse images were analyzed with the aid of BudJ (Ferrezuelo *et al*, 2012), an  
357 ImageJ (Wayne Rasband, NIH) plugin that can be obtained from [www.ibmb.csic.es/home/maldea](http://www.ibmb.csic.es/home/maldea) to  
358 obtain cell dimensions and fluorescence data. Volume growth rate in G1 were obtained as described  
359 (Ferrezuelo *et al*, 2012). Start was estimated at a single-cell level as the time where the nuclear to  
360 cytoplasmic ratio of Whi5 had decreased below 1.5. Photobleaching during acquisition was negligible  
361 (less than 0.1% per time point) and autofluorescence was always subtracted.

### 362 **Determination of nuclear and cellular concentrations of fluorescent fusion proteins**

363 Wide-field microscopy is able to collect the total fluorescence emitted by yeast cells and, consequently,  
364 cellular concentration of fluorescent fusion proteins was obtained by dividing the integrated fluorescence  
365 signal within the projected area of the cell by its volume. Regarding the quantification of nuclear levels,  
366 since the signal in the nuclear projected area is influenced by both nuclear and cytoplasmic fluorescence,  
367 determination of the nuclear concentration required specific calculations as described in Fig EV1A. In  
368 confocal microscopy the fluorescence signal is directly proportional to the concentration of the  
369 fluorescent fusion protein, and required no further calculations. The nuclear compartment was delimited  
370 as described (Ferrezuelo *et al*, 2012).

### 371 **Chaperone mobility analysis by FLIP and FCS**

372 We used fluorescence loss in photobleaching (FLIP) and fluorescence correlation spectroscopy (FCS) to  
373 analyze chaperone mobility in a Zeiss LSM780 confocal microscope. FLIP was used as a qualitative assay  
374 to determine Ssa1-GFP and Ydj1-GFP mobility in the whole cell. A small circular region of the cytoplasm  
375 ( $3.6 \mu\text{m}^2$ ) was repetitively photobleached at full laser power while the cell was imaged at low intensity  
376 every 0.5 sec to record fluorescence loss. After background subtraction, fluorescence data from an  
377 unbleached cell region were made relative to the initial time point, and a mobility index was calculated as  
378 the inverse of the fluorescence half-life obtained by fitting an exponential function to fluorescence  
379 emitted as a function of time. Quantitative analysis of Ydj1-GFP diffusion by FCS was performed  
380 essentially as described (Saarikangas *et al*, 2017). Specifically, FCS analysis was done at 25°C to minimize  
381 signal variability in the 0.1-1 sec range, and cells were prebleached to attain count rates within the 50-  
382 100 kHz range during acquisition for periods of 5 sec. FCS correlation data were fitted in the 10  $\mu\text{sec}$  to  
383 100 msec range of time intervals with the aid of QuickFit 3 (<http://www.dkfz.de/Macromol/quickfit/>),  
384 assuming a 1-component anomalous mode of diffusion ( $\alpha=0.5$ ) in the Levenberg-Marquardt algorithm to  
385 obtain diffusion coefficients. Duplicate measurements were always taken and outliers were removed  
386 from analysis if the relative standard error of the fitted coefficient of diffusion was higher than 50%, or  
387 the fitted autocorrelation intersect was higher than 1.01 as a result of strong perturbations in the average  
388 count rate during acquisition. In time-lapse experiments outliers were removed if the relative difference  
389 to neighbor values was higher than 50%. Removed outliers were always less than 5% of measurements.

### 390 **Nuclear import rate determinations by FLIP**

391 To analyze nuclear import kinetics of Cdc28-GFP, a circle inscribed within the Htb2-mCherry nuclear  
392 region was repetitively photobleached while the cell was imaged every 0.5 sec to record fluorescence  
393 loss. After background subtraction, fluorescence data were corrected with those from a non-bleached  
394 cell. Finally, fluorescence signals within nuclear and cytoplasmic areas were used to analyze import  
395 kinetics as described in Fig EV2A. The export rate was assumed constant among G1 cells and obtained as  
396 described in Fig EV2B.

### 397 **Immunofluorescence**

398 Immunofluorescence of endogenous levels of Cln3-3HA was done by a signal-amplification method  
399 (Vergés *et al*, 2007) with  $\alpha\text{HA}$  (clone 3F10, Roche) and goat- $\alpha\text{rat}$  and rabbit- $\alpha\text{goat}$  Alexa555-labeled  
400 antibodies (Molecular Probes) on methanol-pemeabilized cells. To analyze localization of Cln3-3HA we  
401 used N2CJ, a plugin for ImageJ (Wayne Rasband, NIH), to perform accurate quantification in both  
402 cytoplasmic and nuclear compartments of cells (Yahya *et al*, 2014).

### 403 Model equations

404 The model in Fig 3A was simulated with a set of non-linear differential equations.

$$\frac{d\mathbf{Prot}_U}{dt} = S_{Prot} * Vol - kb * \mathbf{Prot}_U * \frac{Ydj1_A}{Vol} - kd_{ProtU} * \mathbf{Prot}_U + kd_{Ydj1} * \mathbf{YP} \quad (1)$$

$$\frac{d\mathbf{YP}}{dt} = kb * \mathbf{Prot}_U * \frac{Ydj1_A}{Vol} - k_r * \mathbf{YP} - kd_{Ydj1} * \mathbf{YP} - kd_{ProtU} * \mathbf{YP} \quad (2)$$

$$\frac{d\mathbf{Prot}_F}{dt} = kr * \mathbf{YP} - \beta * kd_{ProtU} * \mathbf{Prot}_F \quad (3)$$

405 
$$\frac{d\mathbf{Cln3}_U}{dt} = S_{Cln3} * Vol - kb * \mathbf{Cln3}_U * \frac{Ydj1_A}{Vol} - kd_{Cln3U} * \mathbf{Cln3}_U + kd_{Ydj1} * \mathbf{YC} \quad (4)$$

$$\frac{d\mathbf{YC}}{dt} = kb * \mathbf{Cln3}_U * \frac{Ydj1_A}{Vol} - kr * \mathbf{YC} - kd_{Ydj1} * \mathbf{YC} - kd_{Cln3U} * \mathbf{YC} \quad (5)$$

$$\frac{d\mathbf{Cln3}_F}{dt} = kr * \mathbf{YC} - kd_{Cln3F} * \mathbf{Cln3}_F \quad (6)$$

$$\begin{aligned} \frac{dYdj1_A}{dt} = & S_{Ydj1} * Vol - kb * \mathbf{Prot}_U * \frac{Ydj1_A}{Vol} - kb * \mathbf{Cln3}_U * \frac{Ydj1_A}{Vol} \\ & + kr * \mathbf{YP} + kr * \mathbf{YC} - kd_{Ydj1} * Ydj1_A + kd_{Cln3U} * \mathbf{YC} + kd_{ProtU} * \mathbf{YP} \quad (7) \end{aligned}$$

406 This model has seven state variables:  $\mathbf{Prot}_U$ , unfolded proteins;  $\mathbf{YP}$ , Ydj1-bound proteins;  $\mathbf{Prot}_F$ , folded  
407 proteins;  $\mathbf{Cln3}_U$ , unfolded Cln3;  $\mathbf{YC}$ , Ydj1-bound Cln3;  $\mathbf{Cln3}_F$ , folded Cln3; and  $Ydj1_A$ , free available Ydj1.

### 408 Model parameters and simulations

409 In the model we define eleven parameters (Table 1). Ydj1 binding and release ( $kb$ ,  $kr$ ), which are assumed  
410 to be the same for  $\mathbf{Prot}_U$  and  $\mathbf{Cln3}_U$  (see Fig EV4), and synthesis ( $S_{Prot}$ ,  $S_{Cln3}$ ,  $S_{Ydj1}$ ) and degradation ( $kd_{ProtU}$ ,  
411  $kd_{Cln3U}$ ,  $kd_{Cln3F}$ ,  $kd_{Ydj1}$ ) of the different components. A scaling factor ( $\beta=0.01$ ) is used to ensure that folded  
412 protein ( $\mathbf{Prot}_F$ ) has a half-life 100 times that of unfolded protein ( $\mathbf{Prot}_U$ ). The state variables in the model  
413 are in units of molecular number, not concentration, and therefore all 0<sup>th</sup> and 2<sup>nd</sup> order reactions are  
414 explicitly scaled by cell volume ( $Vol$ ). In the model, we assume that the rate of change of cell volume with  
415 time is much lower than the rates of the biochemical reactions studied. This allowed us to treat the cell  
416 volume as a pseudo-parameter, so the steady state of other variables with respect to cell volume and  
417 growth rate ( $S_{ProtU}$ ) could be analyzed more straightforwardly. The half-life of unfolded ( $kd_{Cln3U}$ ) Cln3 was  
418 set to be 1.8 times longer than folded ( $kd_{Cln3F}$ ) Cln3 as deduced from steady-state levels of Cln3-3HA in  
419 wild-type and Ydj1-deficient cells (Yaglom *et al*, 1996), while Ydj1 is a stable protein, with a half-life 20  
420 times longer than folded Cln3. To reduce the degrees of freedom available for modeling, degradation  
421 rates of all molecules were kept constant independent if they are in a complex or free. The underlying  
422 reasoning is that molecules should be still recognized by their respective degradation machinery  
423 independent of their binding partners. This should be true in our cases, since the binding of Ydj1 to its  
424 targets is highly dynamic. We converted half-lives to degradation rates using the formula  $\lambda = \log(2)/t_{1/2}$ .

425 The remaining five parameters were used to quantitatively fit two sets of measurements: the relationship  
 426 between the diffusion rate of Ydj1 and growth rate in G1 cells (Fig 3F), and the relationship between  
 427 budding volume and growth rate (Fig 3G).

428 **Table 1. Model parameters**

| Parameter    | Definition        | Type       | Value                                                                                | Parameter set 3114                                              |
|--------------|-------------------|------------|--------------------------------------------------------------------------------------|-----------------------------------------------------------------|
| $Vol$        | Cell volume       | Controlled | 10-100 fl                                                                            |                                                                 |
| $S_{ProtU}$  | Protein synthesis | Controlled | 0.01-1 molec·sec <sup>-1</sup> ·fl <sup>-1</sup>                                     |                                                                 |
| $S_{Cln3}$   | Cln3 synthesis    | Fitted     | 4.9·10 <sup>-2</sup> -4.8 molec·sec <sup>-1</sup> ·fl <sup>-1</sup>                  | 0.126 molec·sec <sup>-1</sup> ·fl <sup>-1</sup>                 |
| $S_{Ydj1}$   | Ydj1 synthesis    | Fitted     | 4.8·10 <sup>-5</sup> -6.0·10 <sup>-2</sup> molec·sec <sup>-1</sup> ·fl <sup>-1</sup> | 9.19·10 <sup>-4</sup> molec·sec <sup>-1</sup> ·fl <sup>-1</sup> |
| $kd_{ProtU}$ | ProtU degradation | Fitted     | 6.4·10 <sup>-3</sup> -31.5 sec <sup>-1</sup>                                         | 7.26·10 <sup>-2</sup> sec <sup>-1</sup>                         |
| $kd_{ProtF}$ | ProtF degradation | Fitted     | 0.01* $kd_{ProtU}$ sec <sup>-1</sup>                                                 | 7.26·10 <sup>-4</sup> sec <sup>-1</sup>                         |
| $kb$         | Binding to Ydj1   | Fitted     | 1.4·10 <sup>-2</sup> -26.7 fl·molec <sup>-1</sup> ·sec <sup>-1</sup>                 | 0.891 fl·molec <sup>-1</sup> ·sec <sup>-1</sup>                 |
| $kr$         | Release from Ydj1 | Fitted     | 2.8·10 <sup>-3</sup> -7.7 sec <sup>-1</sup>                                          | 0.388 sec <sup>-1</sup>                                         |
| $kd_{Cln3U}$ | Cln3U degradation | Fixed      | 6.93·10 <sup>-2</sup> sec <sup>-1</sup>                                              |                                                                 |
| $kd_{Cln3F}$ | Cln3F degradation | Fixed      | 3.85·10 <sup>-2</sup> sec <sup>-1</sup>                                              |                                                                 |
| $kd_{Ydj1}$  | Ydj1 degradation  | Fixed      | 5.77·10 <sup>-3</sup> sec <sup>-1</sup>                                              |                                                                 |

429  
 430 **Budding volume vs growth rate**  
 431 In the model, we assume that Start is triggered by Cln3 when reaches a given critical threshold ( $Cln3_F^{crit} =$   
 432 25) that, together with Cdc28, is needed to phosphorylate and inactivate a fixed given amount of DNA-  
 433 bound Whi5/SBF complexes (Schmoller *et al*, 2015; Wang *et al*, 2009). Our objective was then to  
 434 minimize the difference between experimental measurements and simulation results by changing the five  
 435 free parameters in  $L1(\theta) = (Vol(s_{Vol})_{exp} - Vol(\theta | s_{Vol})_{sim})^2$ , where  $Vol(s_{Vol})_{exp}$  is the  
 436 experimentally measured budding volume (as a proxy for the critical volume at Start) of a cell growing at  
 437 rate  $s_{Vol}$ , and  $Vol(\theta | s_{Vol})_{sim}$  is the volume of cells growing at rate  $s_{Vol}$  reach a steady state value  
 438 where  $Cln3_F$  equals the critical threshold  $Cln3_F^{crit}$ .

439 **Ydj1 diffusion vs growth rate**

440 We assume that Ydj1 is present in two distinct pools: a fast diffusing free fraction ( $Ydj1_A$ ), and a slowly  
 441 diffusing fraction bound to either *Prot* or *Cln3* ( $YP+YC$ ). To compare the experimentally measured  
 442 diffusion rate of Ydj1 to our simulations, we define the simulated diffusion rate of Ydj1 as the weighted  
 443 average diffusion coefficient for all species of Ydj1 in our model as follows:

$$444 \quad D_{sim} = \frac{Ydj1_A}{Ydj1} * D_{free} + \frac{YP+YC}{Ydj1} * D_{bound} \quad (8)$$

445 For Ydj1-GFP we estimated that  $D_{bound} = 1 \mu\text{m}^2/\text{min}$  from minimal values observed in AZC-treated cells,  
 446 and  $D_{free} = 30 \mu\text{m}^2/\text{min}$  from maximal values obtained with GFP and corrected by the different Stokes

447 radius. As above, we sought to minimize  $L2(\theta) = (D_{exp}(s_{Vol}, Vol) - D_{sim}(\theta | s_{Vol}, Vol))^2$ , where  
448  $D_{exp}(s_{Vol}, Vol)$  and  $D_{sim}(\theta | s_{Vol}, Vol)$  are the experimental and simulated diffusion coefficients at a  
449 given growth rate and volume in G1 cells.

#### 450 **Fitting procedures**

451 For fitting Ydj1 diffusion and budding volume as a function of growth rate we combined the respective  
452 square differences to seek  $\underset{\theta}{\operatorname{argmin}} L1(\theta) + L2(\theta)$ . To find the optimal value of  $\theta$  we used a variant of the  
453 Levenberg-Marquardt algorithm with a 2<sup>nd</sup> order correction (Transtrum & Sethna, 2012). As all the  
454 simulations were done at steady state, to obtain the Jacobian of the steady state with respect to the  
455 parameters, we applied the implicit function theorem following the approach described here:  
456 <https://arxiv.org/pdf/1602.02355.pdf>. Numerical integration of the differential equations (to obtain an  
457 initial value for the steady state root finding) was done using the *SciPy routine odeint*, which automatically  
458 switches between stiff and non-stiff solvers. After identifying the minima, we performed a Markov Chain  
459 Monte Carlo (Goodman & Weare, 2010) exploration of the parameter space using *emcee* (Foreman-  
460 Mackey *et al*, 2013). After discarding the initial 3000 draws of the MC chain as burn-in, which were too  
461 close to the minima, we collected 1500 sets with good match to data and repeated all simulations using  
462 this ensemble of parameters to estimate the uncertainty in parameters (Fig 3B) and simulations of  
463 variables used in the initial exhaustive fitting process (Fig 3F and 3G). Simulations of other variables that  
464 were experimentally tested (Fig 3H, 4B and 5B) were done with parameter set 3114 (Table 1), which gave  
465 the minimal p value in the fitting process, and using a 4-fold range of values for the Ydj1-binding and  
466 release constant rates ( $kb$  and  $kr$ , respectively). CHX effects were simulated by reducing  $ksProt$ ,  $ksCln3$  and  
467  $ksYdj1$  3, 4.5, 6, 9, or 12-fold to test different conditions around the experimental reduction of 5.9-fold (Fig  
468 EV7). Stress effects were simulated on steady states by transferring different fractions (20-80%) of the  
469 folded protein (ProtF and Cln3F) to the unfolded population (ProtU and Cln3U, respectively). To simulate  
470 transient effects in Cln3F by stress, experimental data of Ydj1-GFP mobility were used to fit the model time  
471 variable at different percentages of protein unfolding (Fig 5CD), resulting in 60% for salt stress and 80% for  
472 heat stress. We took into account that heat, but not salt, stress increases Ydj1 mRNA levels by 2.9-fold  
473 (Gasch *et al*, 2000). Then, the resulting fitted parameters were applied to the model to simulate the  
474 evolution of Cln3F after stress assuming that ProtU and Cln3U compete or not for Ydj1A (Fig 5GH). The  
475 model was deposited in the BioModels (Chelliah *et al*, 2015) database as MODEL1808310001 in SBML  
476 format and a Copasi (Hoops *et al*, 2006) file to reproduce simulations with parameter set 3114. Code of  
477 the estimation of minima in IPython Notebooks is available upon request.



478 **Parameter distributions**

479 As amply described in the literature, parameters in systems biology models are disheveled (Gutenkunst *et*  
480 *al*, 2007) or structurally unidentifiable (Szederkényi *et al*, 2011). We observed this behavior as well (Fig  
481 3B), with parameters consistent with the experimental data spanning several orders of magnitude.

482 **Statistical analysis**

483 We routinely show the standard error of the mean ( $N < 10$ ) or confidence limits at  $\alpha = 0.05$  ( $N > 10$ ) to allow  
484 direct evaluation of variability and differences between mean values in plots. Sample size is always  
485 indicated in the figure legend and, when appropriate, t-test p values are shown in the text. For model  
486 predictions the mean values and standard deviations are plotted. All experiments were done at least  
487 twice with fully independent cell samples.

488 **Miscellaneous**

489 *In vitro* luciferase refolding assays have been described (Summers *et al*, 2009). Translational efficiency of  
490 refolding extracts was measured by incubation with 0.1 mM puromycin. Immunoblot analysis with  
491  $\alpha$ puromycin (clone 12D10, Sigma),  $\alpha$ HA (clone 12CA5, Roche) and  $\alpha$ Dpm1 (clone 5C5, Molecular Probes)  
492 was as described (Georgieva *et al*, 2015). Ydj1 binding assays to GST-fusions of Cln3, luciferase and P6, a  
493 selected Ydj1-target peptide (Kota *et al*, 2009) used as reference, were done with purified proteins as  
494 described (Lee *et al*, 2002). Protein synthesis rates in live cells were determined by  $S^{35}$ -methionine  
495 incorporation (Gallego *et al*, 1997).

496

497 **ACKNOWLEDGEMENTS**

498 We thank A. Cornadó and E. Rebollo for technical assistance, T.Zimmermann for technical advice in FCS  
499 experiments, and B. Futcher and J. Skotheim for providing strains. We also thank C. Rose for editing the  
500 manuscript, and F. Antequera, Y. Barral, C. Gallego, J.C. Igual, S. Oliferenko and F. Posas for helpful  
501 comments. This work was funded by the Spanish Ministry of Science, Consolider-Ingenio 2010, and the  
502 European Union (FEDER) to M.A. D.F.M. received a FI fellowship from *Generalitat de Catalunya*.

503

504 **AUTHOR CONTRIBUTIONS**

505 D.F.M., E.P. and G.Y. built genetic constructs and strains, and performed the experiments. F.V. and A. C.-  
506 N. implemented the mathematical model and performed the informatic analysis. A. C.-N. and M.A.  
507 conceived the study, designed the mathematical model, analyzed the data and wrote the manuscript.

508

## 509 REFERENCES

- 510 Aldea M, Jenkins K, Csikász-Nagy A (2017) Growth rate as a direct regulator of the Start network to set  
511 cell size. *Front. Cell Dev. Biol.* 5: 57
- 512 Baroni MD, Monti P, Alberghina L (1994) Repression of growth-regulated G1 cyclin expression by cyclic  
513 AMP in budding yeast. *Nature* 371: 339–342
- 514 Bellí G, Garí E, Aldea M, Herrero E (2001) Osmotic stress causes a G1 cell cycle delay and downregulation  
515 of Cln3/Cdc28 activity in *Saccharomyces cerevisiae*. *Mol. Microbiol.* 39: 1022–1035
- 516 Bertoli C, Skotheim JM, de Bruin RAM (2013) Control of cell cycle transcription during G1 and S phases.  
517 *Nat. Rev. Mol. Cell Biol.* 14: 518–528
- 518 Blake WJ, Kaern M, Cantor CR, Collins JJ (2003) Noise in eukaryotic gene expression. *Nature* 422: 633–637
- 519 Brauer MJ, Huttenhower C, Airoidi EM, Rosenstein R, Matese JC, Gresham D, Boer VM, Troyanskaya OG,  
520 Botstein D (2008) Coordination of growth rate, cell cycle, stress response, and metabolic activity in  
521 yeast. *Mol. Biol. Cell* 19: 352–367
- 522 Caplan AJ, Cyr DM, Douglas MG (1992) YDJ1p facilitates polypeptide translocation across different  
523 intracellular membranes by a conserved mechanism. *Cell* 71: 1143–1155
- 524 Chelliah V, Juty N, Ajmera I, Ali R, Dumousseau M, Glont M, Hucka M, Jalowicki G, Keating S, Knight-  
525 Schrijver V, Lloret-Villas A, Natarajan KN, Pettit J-B, Rodriguez N, Schubert M, Wimalaratne SM, Zhao  
526 Y, Hermjakob H, Le Novère N, Laibe C (2015) BioModels: ten-year anniversary. *Nucleic Acids Res.* 43:  
527 D542–D548
- 528 Colomina N, Ferrezuelo F, Wang H, Aldea M, Gari E (2008) Whi3, a developmental regulator of budding  
529 yeast, binds a large set of mRNAs functionally related to the endoplasmic reticulum. *J. Biol. Chem.*  
530 283: 28670–28679
- 531 Cook M, Tyers M (2007) Size control goes global. *Curr. Opin. Biotechnol.* 18: 341–350
- 532 Cross FR, Archambault V, Miller M, Klovstad M (2002) Testing a mathematical model of the yeast cell  
533 cycle. *Mol. Biol. Cell* 13: 52–70
- 534 Cross FR, Blake CM (1993) The yeast Cln3 protein is an unstable activator of Cdc28. *Mol. Cell. Biol.* 13:  
535 3266–3271
- 536 Diehl JA, Yang W, Rimerman RA, Xiao H, Emili A (2003) Hsc70 regulates accumulation of cyclin D1 and  
537 cyclin D1-dependent protein kinase. *Mol. Cell. Biol.* 23: 1764–1774
- 538 Edgington NP, Futcher B (2001) Relationship between the function and the location of G1 cyclins in *S.*  
539 *cerevisiae*. *J. Cell Sci.* 114: 4599–4611
- 540 Escusa-Toret S, Vonk WIM, Frydman J (2013) Spatial sequestration of misfolded proteins by a dynamic  
541 chaperone pathway enhances cellular fitness during stress. *Nat. Cell Biol.* 15: 1231–1243
- 542 Fantes P, Nurse P (1977) Control of cell size at division in fission yeast by a growth-modulated size control  
543 over nuclear division. *Exp. Cell Res.* 107: 377–386
- 544 Ferrezuelo F, Colomina N, Palmisano A, Garí E, Gallego C, Csikász-Nagy A, Aldea M (2012) The critical size  
545 is set at a single-cell level by growth rate to attain homeostasis and adaptation. *Nat. Commun.* 3:  
546 1012
- 547 Foreman-Mackey D, Hogg DW, Lang D, Goodman J (2013) emcee : The MCMC Hammer. *Publ. Astron. Soc.*  
548 *Pacific* 125: 306–312
- 549 Gallego C, Garí E, Colomina N, Herrero E, Aldea M (1997) The Cln3 cyclin is down-regulated by

- 550 translational repression and degradation during the G1 arrest caused by nitrogen deprivation in  
551 budding yeast. *EMBO J.* 16: 7196–7206
- 552 Gardner BM, Pincus D, Gotthardt K, Gallagher CM, Walter P (2013) Endoplasmic reticulum stress sensing  
553 in the unfolded protein response. *Cold Spring Harb. Perspect. Biol.* 5: 1–15
- 554 Gasch AP, Spellman PT, Kao CM, Carmel-Harel O, Eisen MB, Storz G, Botstein D, Brown PO (2000)  
555 Genomic expression programs in the response of yeast cells to environmental changes. *Mol. Biol.*  
556 *Cell* 11: 4241–4257
- 557 Georgieva M V, Yahya G, Codó L, Ortiz R, Teixidó L, Claros J, Jara R, Jara M, Iborra A, Gelpí JL, Gallego C,  
558 Orozco M, Aldea M (2015) Inntags: small self-structured epitopes for innocuous protein tagging.  
559 *Nat. Methods* 12: 955–8
- 560 Gong Y, Kakiyama Y, Krogan N, Greenblatt J, Emili A, Zhang Z, Houry W a (2009) An atlas of chaperone-  
561 protein interactions in *Saccharomyces cerevisiae*: implications to protein folding pathways in the  
562 cell. *Mol. Syst. Biol.* 5: 275
- 563 González-Novo A, Jiménez J, Clotet J, Nadal-Ribelles M, Cavero S, de Nadal E, Posas F (2015) Hog1 targets  
564 Whi5 and Msa1 transcription factors to downregulate cyclin expression upon stress. *Mol. Cell. Biol.*  
565 35: 1606–1618
- 566 Goodman J, Weare J (2010) Ensemble samplers with affine invariance. *Commun. Appl. Math. Comput. Sci.*  
567 5: 65–80
- 568 Gutenkunst RN, Waterfall JJ, Casey FP, Brown KS, Myers CR, Sethna JP (2007) Universally sloppy  
569 parameter sensitivities in systems biology models. *PLoS Comput. Biol.* 3: e189
- 570 Hall DD, Markwardt DD, Parviz F, Heideman W (1998) Regulation of the Cln3-Cdc28 kinase by cAMP in  
571 *Saccharomyces cerevisiae*. *EMBO J.* 17: 4370–4378
- 572 Hamdan N, Kritsiligkou P, Grant CM (2017) ER stress causes widespread protein aggregation and prion  
573 formation. *J Cell Biol* 216: 2295–2304
- 574 Harris LK, Theriot JA (2016) Relative rates of surface and volume synthesis set bacterial cell size. *Cell* 165:  
575 1479–1492
- 576 Holmes KJ, Klass DM, Guiney EL, Cyert MS (2013) Whi3, an *S. cerevisiae* RNA-binding protein, is a  
577 component of stress granules that regulates levels of its target mRNAs. *PLoS One* 8: e84060
- 578 Hoops S, Sahle S, Gauges R, Lee C, Pahle J, Simus N, Singhal M, Xu L, Mendes P, Kummer U (2006) COPASI-  
579 -a COMplex PATHway Simulator. *Bioinformatics* 22: 3067–3074
- 580 Jacquet M (2003) Oscillatory nucleocytoplasmic shuttling of the general stress response transcriptional  
581 activators Msn2 and Msn4 in *Saccharomyces cerevisiae*. *J. Cell Biol.* 161: 497–505
- 582 Johnston GC, Ehrhardt CW, Lorincz A, Carter BL (1979) Regulation of cell size in the yeast *Saccharomyces*  
583 *cerevisiae*. *J. Bacteriol.* 137: 1–5
- 584 Jorgensen P, Rupes I, Sharom JR, Schneper L, Broach JR, Tyers M (2004) A dynamic transcriptional  
585 network communicates growth potential to ribosome synthesis and critical cell size. *Genes Dev.* 18:  
586 2491–505
- 587 Kampinga HH, Craig EA (2010) The HSP70 chaperone machinery: J proteins as drivers of functional  
588 specificity. *Nat. Rev. Mol. Cell Biol.* 11: 579–592
- 589 Kim YE, Hipp MS, Bracher A, Hayer-Hartl M, Ulrich-Hartl F (2013) Molecular chaperone functions in  
590 protein folding and proteostasis. *Annu. Rev. Biochem.* 82: 323–355
- 591 Kota P, Summers DW, Ren H-Y, Cyr DM, Dokholyan N V. (2009) Identification of a consensus motif in

- 592 substrates bound by a Type I Hsp40. *Proc. Natl. Acad. Sci.* 106: 11073–11078
- 593 Lajoie P, Moir RD, Willis IM, Snapp EL (2012) Kar2p availability defines distinct forms of endoplasmic  
594 reticulum stress in living cells. *Mol. Biol. Cell* 23: 955–964
- 595 Lee S, Fan CY, Younger JM, Ren H, Cyr DM, Michael Younger J, Ren H, Younger JM, Ren H, Cyr DM (2002)  
596 Identification of essential residues in the type II Hsp40 Sis1 that function in polypeptide binding. *J.*  
597 *Biol. Chem.* 277: 21675–21682
- 598 Leitao RM, Kellogg DR (2017) The duration of mitosis and daughter cell size are modulated by nutrients in  
599 budding yeast. *J. Cell Biol.* 216: 3463–3470
- 600 Liu X, Wang X, Yang X, Liu S, Jiang L, Qu Y, Hu L, Ouyang Q, Tang C (2015) Reliable cell cycle commitment  
601 in budding yeast is ensured by signal integration. *Elife* 4: e03977
- 602 Lloyd AC (2013) The regulation of cell size. *Cell* 154: 1194–1205
- 603 Louvion JF, Havaux-Copf B, Picard D (1993) Fusion of GAL4-VP16 to a steroid-binding domain provides a  
604 tool for gratuitous induction of galactose-responsive genes in yeast. *Gene* 131: 129–134
- 605 Marshall WF, Young KD, Swaffer M, Wood E, Nurse P, Kimura A, Frankel J, Wallingford J, Walbot V, Qu X,  
606 Roeder AHK (2012) What determines cell size? *BMC Biol.* 10: 101
- 607 McClellan AJ, Endres JB, Vogel JP, Palazzi D, Rose MD, Brodsky JL (1998) Specific molecular chaperone  
608 interactions and an ATP-dependent conformational change are required during posttranslational  
609 protein translocation into the yeast ER. *Mol. Biol. Cell* 9: 3533–3545
- 610 Menoyo S, Ricco N, Bru S, Hernández-Ortega S, Escoté X, Aldea M, Clotet J (2013) Phosphate-activated  
611 cyclin-dependent kinase stabilizes G1 cyclin to trigger cell cycle entry. *Mol. Cell. Biol.* 33: 1273–1284
- 612 Miller ME, Cross FR (2001) Mechanisms controlling subcellular localization of the G1 cyclins Cln2p and  
613 Cln3p in budding yeast. *Mol. Cell. Biol.* 21: 6292–6311
- 614 Mitchison JM (1988) Synchronous cultures and age fractionation. In *Yeast, a practical approach*, Campbell  
615 I & Duffus J (eds) pp 51–64. Oxford, UK: IRL Press
- 616 Mogk A, Bukau B, Kampinga HH (2018) Cellular handling of protein aggregates by disaggregation  
617 machines. *Mol. Cell* 69: 214–226
- 618 De Nadal E, Ammerer G, Posas F (2011) Controlling gene expression in response to stress. *Nat. Rev.*  
619 *Genet.* 12: 833–845
- 620 Nash R, Tokiwa G, Anand S, Erickson K, Fitcher AB (1988) The WHI1+ gene of *Saccharomyces cerevisiae*  
621 tethers cell division to cell size and is a cyclin homolog. *EMBO J.* 7: 4335–4346
- 622 Newcomb LL, Hall DD, Heideman W (2002) AZF1 is a glucose-dependent positive regulator of CLN3  
623 transcription in *Saccharomyces cerevisiae*. *Mol. Cell. Biol.* 22: 1607–1614
- 624 Palumbo P, Vanoni M, Cusimano V, Busti S, Marano F, Manes C, Alberghina L (2016) Whi5  
625 phosphorylation embedded in the G1/S network dynamically controls critical cell size and cell fate.  
626 *Nat. Commun.* 7: 11372
- 627 Parisi E, Yahya G, Flores A, Aldea M (2018) Cdc48 / p97 segregase is modulated by Cdk to determine  
628 cyclin fate during G1 progression. *EMBO J.* 37: e98724
- 629 Polymenis M, Schmidt E V (1997) Coupling of cell division to cell growth by translational control of the G1  
630 cyclin CLN3 in yeast. *Genes Dev.* 11: 2522–2531
- 631 Rowley A, Johnston GC, Butler B, Werner-Washburne M, Singer RA (1993) Heat shock-mediated cell cycle  
632 blockage and G1 cyclin expression in the yeast *Saccharomyces cerevisiae*. *Mol. Cell. Biol.* 13: 1034–

- 633 1041
- 634 Saarikangas J, Caudron F, Prasad R, Moreno DF, Bolognesi A, Aldea M, Barral Y (2017)  
635 Compartmentalization of ER-bound chaperone confines protein deposit formation to the aging  
636 yeast cell. *Curr. Biol.* 27: 773–783
- 637 Schmoller KM, Turner JJ, Kõivomägi M, Skotheim JM (2015) Dilution of the cell cycle inhibitor Whi5  
638 controls budding yeast cell size. *Nature* 526: 268–272
- 639 Schneider BL, Zhang J, Markwardt J, Tokiwa G, Volpe T, Honey S, Futcher B (2004) Growth rate and cell  
640 size modulate the synthesis of, and requirement for, G1-phase cyclins at Start. *Mol. Cell. Biol.* 24:  
641 10802–10813
- 642 Soifer I, Barkai N (2014) Systematic identification of cell size regulators in budding yeast. *Mol. Syst. Biol.*  
643 10: 761
- 644 Spiesser TW, Kühn C, Krantz M, Klipp E (2015) Bud-localization of CLB2 mRNA can constitute a growth  
645 rate dependent daughter sizer. *PLOS Comput. Biol.* 11: e1004223
- 646 Spiesser TW, Müller C, Schreiber G, Krantz M, Klipp E (2012) Size homeostasis can be intrinsic to growing  
647 cell populations and explained without size sensing or signalling. *FEBS J.* 279: 4213–4230
- 648 Sudbery PE, Goodey AR, Carter BL (1980) Genes which control cell proliferation in the yeast  
649 *Saccharomyces cerevisiae*. *Nature* 288: 401–404
- 650 Summers DW, Douglas PM, Ren H-YY, Cyr DM (2009) The type I Hsp40 Ydj1 utilizes a farnesyl moiety and  
651 zinc finger-like region to suppress prion toxicity. *J. Biol. Chem.* 284: 3628–3639
- 652 Szederkényi G, Banga JR, Alonso AA (2011) Inference of complex biological networks: distinguishability  
653 issues and optimization-based solutions. *BMC Syst. Biol.* 5: 177
- 654 Taipale M, Krykbaeva I, Koeva M, Kayatekin C, Westover KD, Karras GI, Lindquist S (2012) Quantitative  
655 analysis of HSP90-client interactions reveals principles of substrate recognition. *Cell* 150: 987–1001
- 656 Taipale M, Tucker G, Peng J, Krykbaeva I, Lin Z, Larsen B, Choi H (2014) A quantitative chaperone  
657 interaction network reveals the architecture of cellular protein homeostasis pathways. *Cell* 158:  
658 434–448
- 659 Talarek N, Gueydon E, Schwob E (2017) Homeostatic control of START through negative feedback  
660 between Cln3-Cdk1 and Rim15/Greatwall kinase in budding yeast. *Elife* 6: e26233
- 661 Tokiwa G, Tyers M, Volpe T, Futcher B (1994) Inhibition of G1 cyclin activity by the Ras/cAMP pathway in  
662 yeast. *Nature* 371: 342–345
- 663 Transtrum MK, Sethna JP (2012) Improvements to the Levenberg-Marquardt algorithm for nonlinear  
664 least-squares minimization. *arXiv* 1201: 1–32
- 665 Travers KJ, Patil CK, Wodicka L, Lockhart DJ, Weissman JS, Walter P (2000) Functional and genomic  
666 analyses reveal an essential coordination between the unfolded protein response and ER-associated  
667 degradation. *Cell* 101: 249–258
- 668 Trotter EW, Berenfeld L, Krause S a, Petsko G a, Gray J V (2001) Protein misfolding and temperature up-  
669 shift cause G1 arrest via a common mechanism dependent on heat shock factor in *Saccharomyces*  
670 *cerevisiae*. *Proc. Natl. Acad. Sci. U. S. A.* 98: 7313–7318
- 671 Trotter EW, Kao CM-F, Berenfeld L, Botstein D, Petsko G a, Gray J V (2002) Misfolded proteins are  
672 competent to mediate a subset of the responses to heat shock in *Saccharomyces cerevisiae*. *J. Biol.*  
673 *Chem.* 277: 44817–44825
- 674 Truman AW, Kristjansdottir K, Wolfgeher D, Hasin N, Polier S, Zhang H, Perrett S, Prodromou C, Jones GW,

- 675 Kron SJ (2012) CDK-dependent Hsp70 phosphorylation controls G1 cyclin abundance and cell-cycle  
676 progression. *Cell* 151: 1308–1318
- 677 Turner JJ, Ewald JC, Skotheim JM (2012) Cell size control in yeast. *Curr. Biol.* 22: R350-359
- 678 Tyers M, Tokiwa G, Futcher B (1993) Comparison of the *Saccharomyces cerevisiae* G1 cyclins: Cln3 may be  
679 an upstream activator of Cln1, Cln2 and other cyclins. *EMBO J.* 12: 1955–1968
- 680 Tyson CB, Lord PG, Wheals a E (1979) Dependency of size of *Saccharomyces cerevisiae* cells on growth  
681 rate. *J. Bacteriol.* 138: 92–98
- 682 Vai M, Popolo L, Alberghina L (1987) Effect of tunicamycin on cell cycle progression in budding yeast. *Exp.*  
683 *Cell Res.* 171: 448–59
- 684 Vaughan CK, Gohlke U, Sobott F, Good VM, Ali MMU, Prodromou C, Robinson C V, Saibil HR, Pearl LH  
685 (2006) Structure of an Hsp90-Cdc37-Cdk4 complex. *Mol. Cell* 23: 697–707
- 686 Vergés E, Colomina N, Garí E, Gallego C, Aldea M (2007) Cyclin Cln3 is retained at the ER and released by  
687 the J chaperone Ydj1 in late G1 to trigger cell cycle entry. *Mol. Cell* 26: 649–662
- 688 Verghese J, Abrams J, Wang Y, Morano KA (2012) Biology of the heat shock response and protein  
689 chaperones: budding yeast (*Saccharomyces cerevisiae*) as a model system. *Microbiol. Mol. Biol. Rev.*  
690 76: 115–158
- 691 Wang H, Carey LB, Cai Y, Wijnen H, Futcher B (2009) Recruitment of Cln3 cyclin to promoters controls cell  
692 cycle entry via histone deacetylase and other targets. *PLoS Biol.* 7: e1000189
- 693 Yaglom J, Linskens MHK, Sadis S, Rubin DM, Futcher B, Finley D (1995) p34 Cdc28 -mediated control of  
694 Cln3 cyclin degradation. *Mol. Cell. Biol.* 15: 731–741
- 695 Yaglom JA, Goldberg AL, Finley D, Sherman MY (1996) The molecular chaperone Ydj1 is required for the  
696 p34CDC28-dependent phosphorylation of the cyclin Cln3 that signals its degradation. *Mol. Cell. Biol.*  
697 16: 3679–3684
- 698 Yahya G, Parisi E, Flores A, Gallego C, Aldea M (2014) A Whi7-anchored loop controls the G1 Cdk-cyclin  
699 complex at Start. *Mol. Cell* 53: 115–126
- 700

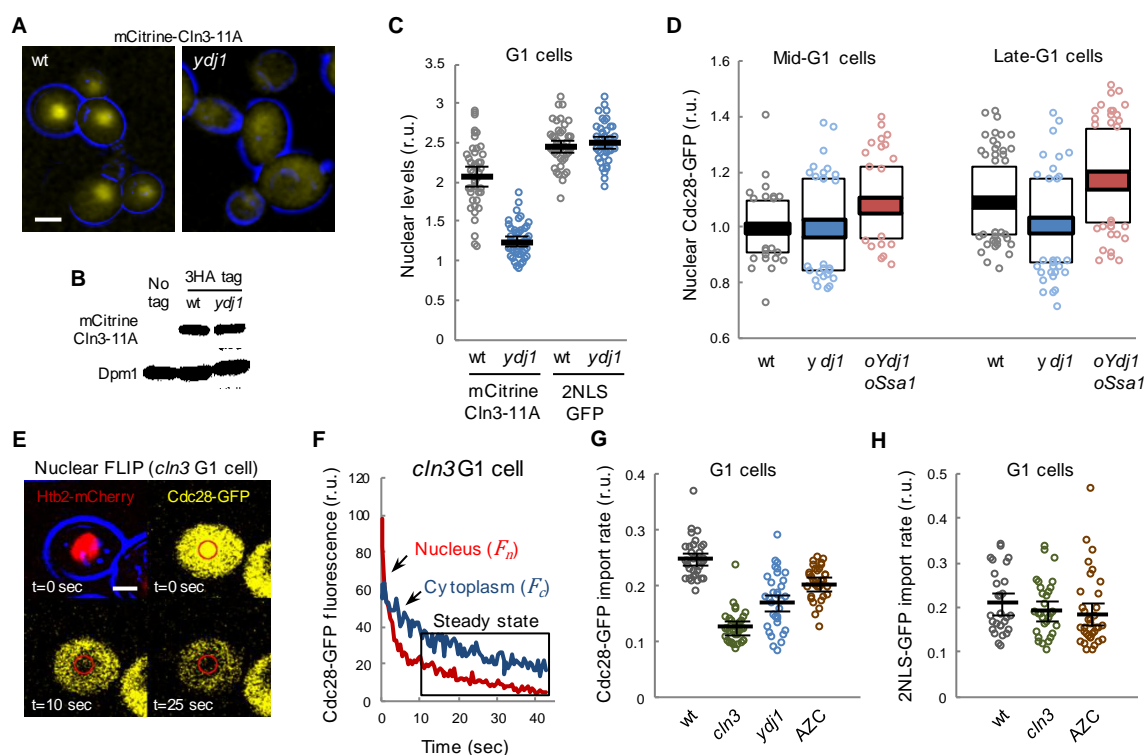

701  
702

**Figure 1. Nuclear accumulation of the G1 Cdk depends on chaperone function.**

703  
704 A Images corresponding to wild-type (wt) and Ydj1-deficient (*ydj1*) cells expressing mCitrine-Cln3-11A. Bar is 2  $\mu$ m.  
705 B Immunoblotting analysis of 3HA-tagged mCitrine-Cln3-11A levels in wild-type and *ydj1* cells. Dpm1 is shown as  
706 loading control.  
707 C Nuclear to cytoplasmic mCitrine-Cln3-11A and 2NLS-GFP ratios for individual wild-type and *ydj1* G1 cells. Mean  
708 (N=30, thick lines) and confidence limits ( $\alpha=0.05$ , thin lines) for the mean are also plotted.  
709 D Cdc28-GFP wild-type (wt), Ydj1-deficient (*ydj1*) or overexpressing Ydj1 and Ssa1 (*oYdj1 oSsa1*) cells were analyzed by  
710 time-lapse microscopy during G1 progression. Mean (N>100) nuclear to cytoplasmic Cdc28-GFP ratios are plotted  
711 with respective standard deviation (white boxes) and confidence ( $\alpha=0.05$ , colored boxes) intervals for the mean at  
712 either mid (36-45 min before Start) or late G1 (18-21 min before Start).  
713 E Analysis of Cdc-28-GFP import by nuclear FLIP. A representative *cln3* cell expressing Cdc28-GFP and Htb2-mCherry at  
714 different times during nuclear photobleaching is shown. Bar is 1  $\mu$ m.  
715 F A representative nuclear FLIP output of Cdc28-GFP in a Cln3-deficient G1 cell showing fluorescence decay in nuclear  
716 and cytoplasmic compartments.  
717 G Cdc28-GFP import rates in wild-type (wt), Cln3-deficient (*cln3*), and Ydj1-deficient (*ydj1*) single cells in G1 phase.  
718 Wild-type cells treated with AZC are also shown. Mean values (N>30, thick lines) with confidence limits for the mean  
719 ( $\alpha=0.05$ , thin lines) are also plotted.  
720 H 2NLS-GFP-EBD import rates in wild-type (wt) and Cln3-deficient (*cln3*) G1 single cells after in the presence of 1 $\mu$ M  
721 auxin. Wild-type cells treated with AZC are also shown. Mean values (N>30, thick lines) with confidence limits for the  
722 mean ( $\alpha=0.05$ , thin lines) are also plotted.  
723

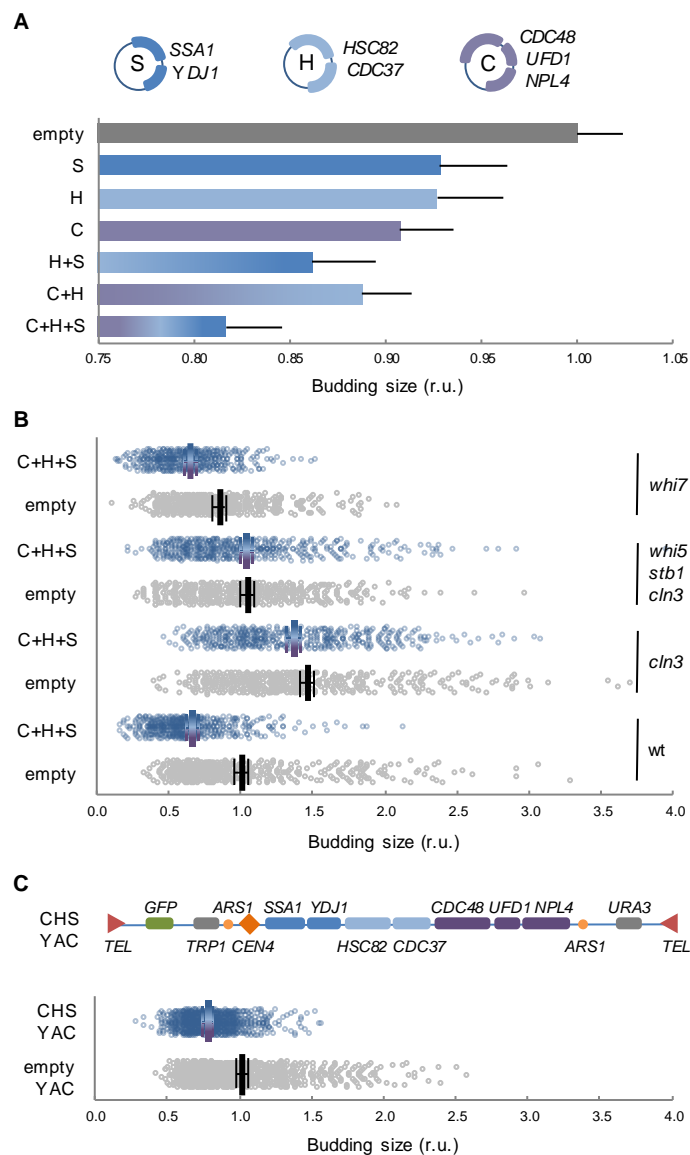

724  
725

726

**Figure 2. Chaperones of the Hsp70, Hsp90 and Cdc48 systems are limiting for cell cycle entry.**

727

A Budding volume of yeast cells transformed with the indicated combinations of compatible centromeric vectors encoding chaperones of the Hsp70 (S, *SSA1* and *YDJ1*), Hsp90 (H, *HSC82* and *CDC37*), and Cdc48 (C, *CDC48*, *UFD1* and *NPL4*) systems. Individual budding volumes were determined and made relative to the mean value for wild-type cells transformed with the corresponding empty vectors. Mean values (N>200) and confidence limits ( $\alpha=0.05$ , thin vertical lines) for the mean are plotted.

731

732

B Yeast cells with indicated genotypes were transformed with empty or compatible centromeric vectors encoding the three chaperone systems (C+H+S) and budding volumes were determined as in panel A. Individual data (N>400), mean values (thick vertical lines) and confidence limits ( $\alpha=0.05$ , thin vertical lines) for the mean are plotted.

735

736

C Budding volume of yeast cells transformed with an artificial chromosome encoding the three chaperone systems (CHS YAC) or empty vector. Budding volumes were determined as in panel A. Individual data (N<400), mean values (thick vertical lines) and confidence limits ( $\alpha=0.05$ , thin vertical lines) for the mean are plotted.

738

739



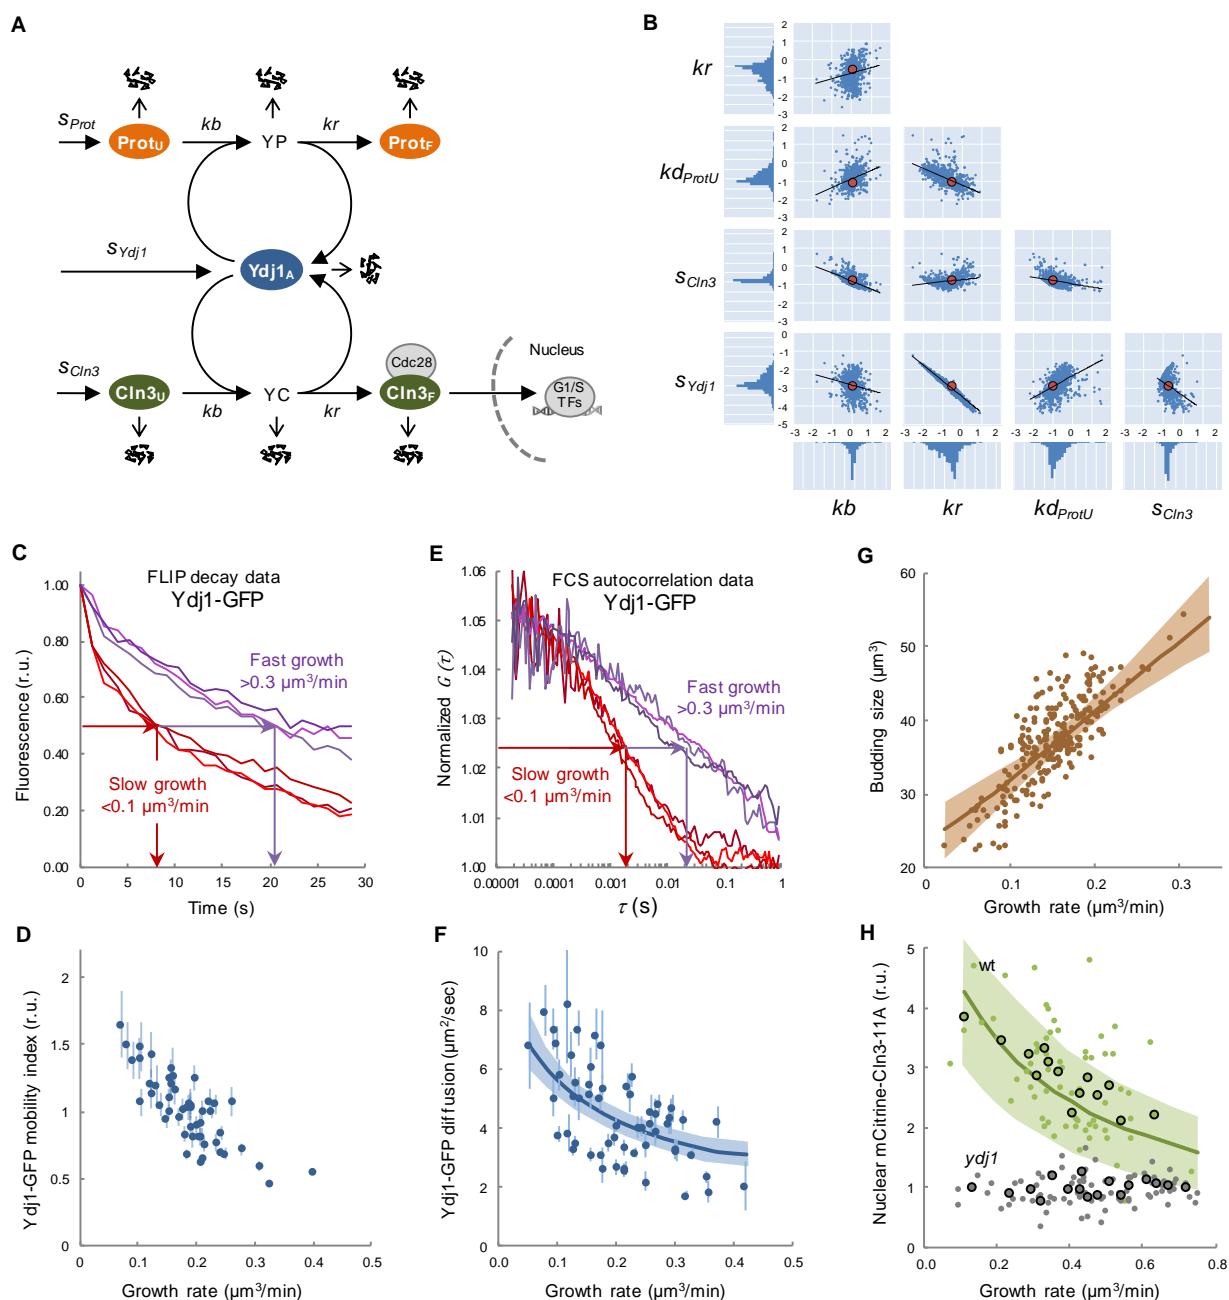

740  
741

742 **Figure 3. The molecular competition model, chaperone availability and nuclear accumulation of Cln3.**

743 **A** Scheme of the chaperone competition model connecting protein synthesis and Cln3 folding and complex  
744 formation with Cdc28. Chaperones associate to the unfolded protein (Prot<sub>U</sub>) mostly in a transient manner until  
745 the properly folded protein (Prot<sub>F</sub>) is released. Thus, protein synthesis rate would be a key determinant of the  
746 level of available Ydj1 (Ydj1<sub>A</sub>) in the free pool and, as it is essential in proper folding and release of Cln3 (Cln3<sub>F</sub>), it  
747 would in turn govern the rate of Whi5 phosphorylation in the nucleus for triggering Start. Variables and  
748 parameters used in the model are indicated. All key components of the competition model are subject to specific  
749 rates of degradation (open arrows) as described in Materials and Methods.

750 **B** Distribution of parameters of the model fitted to experimental data of Ydj1 diffusion and critical volume as a  
751 function of growth rate. Parameter sets sampled using Markov Chain Monte Carlo (small blue circles) are plotted  
752 in log<sub>10</sub> space as well as the corresponding mode values (large red circles) and regression lines. One-dimensional  
753 histograms of parameter values are also plotted adjacent to the axes.

- 754 C Yeast cells expressing Ydj1-GFP were analyzed by FLIP in time-lapse experiments to determine also growth rate at  
755 a single-cell level. Individual FLIP decay data are plotted for three fast ( $>0.3 \mu\text{m}^3/\text{min}$ , purple lines) and three slow  
756 ( $<0.1 \mu\text{m}^3/\text{min}$ , red lines) growing cells.
- 757 D Ydj1-GFP mobility indexes (circles) were obtained from FLIP decay curves as shown in panel C and plotted as a  
758 function of growth rate with the corresponding confidence limits ( $\alpha=0.05$ ).
- 759 E Yeast cells expressing Ydj1-GFP were analyzed by FCS in time-lapse experiments to determine also growth rate at  
760 a single-cell level. Individual FCS autocorrelation data are plotted for three fast ( $>0.3 \mu\text{m}^3/\text{min}$ , purple lines) and  
761 three slow ( $<0.1 \mu\text{m}^3/\text{min}$ , red lines) growing cells.
- 762 F Ydj1-GFP diffusion coefficients (circles) were obtained from FCS autocorrelation functions as shown in panel E and  
763 plotted as a function of growth rate with the corresponding standard error. The mean fit produced by the full  
764 ensemble of parameter sets shown in panel B is plotted as a line with one standard deviation intervals.
- 765 G The chaperone competition model predicts the critical size being a function of growth rate at the single-cell level.  
766 Experimental budding volumes as a function of growth rate (closed circles) and the mean fit as in panel F are  
767 shown.
- 768 H Nuclear to cytoplasmic ratios for mCitrine-Cln3-11A from G1 wild-type (wt, green, N=68) and Ydj1-deficient (*ydj1*,  
769 gray, N=85) cells as a function of growth rate. Mean values (large circles) and confidence limits ( $\alpha=0.05$ ) for  
770 binned (5 cells/bin) data are also shown. A simulation of Cln3F was obtained with parameter set 3114 within a 4-  
771 fold range of *kd* and *kr*, and the resulting mean (green line) is plotted with one standard deviation intervals.  
772  
773

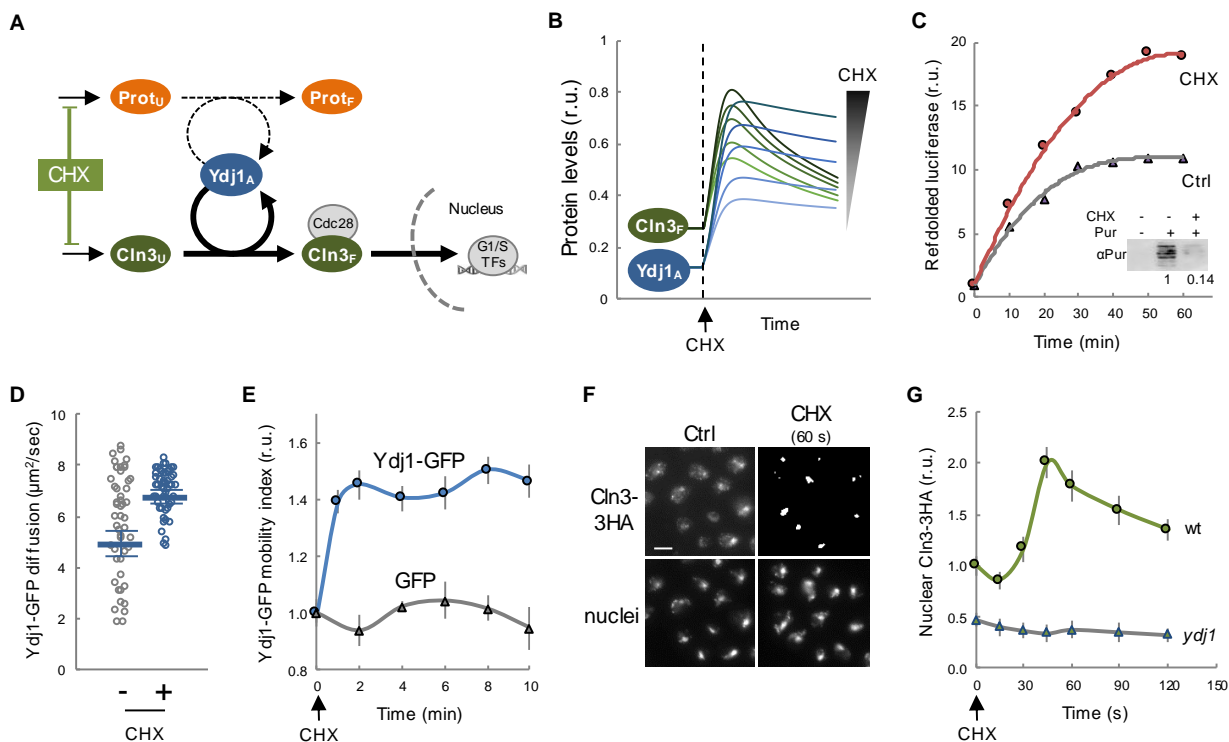

774  
775  
776  
777  
778  
779  
780  
781  
782  
783  
784  
785  
786  
787  
788  
789  
790  
791  
792  
793  
794  
795  
796

**Figure 4. Protein synthesis is a key determinant of chaperone availability and nuclear accumulation of Cln3.**

- A The competition model predicts that reducing the protein synthesis rate would decrease the requirements of Ydj1 chaperone in folding of new proteins ( $Prot_F$ ), and increase the level of available chaperone ( $Ydj1_A$ ) and free Cln3 ( $Cln3_F$ ).
- B Prediction of available chaperone ( $Ydj1_A$ ) and free Cln3 ( $Cln3_F$ ) levels as a function of time after CHX addition. Simulations were produced by using parameter set 3114 and varying (3, 4.5, 6, 9, or 12-fold) reductions in protein synthesis rates around the experimental value (Fig EV7).
- C Refolded luciferase activity as a function of time in yeast cell extracts treated or not with 20  $\mu\text{g/ml}$  CHX in the presence of an ATP-regenerating system. Inset: Immunoblot analysis of puromycin incorporation in cell-free extracts used for refolding analysis in the absence or presence of 20  $\mu\text{g/ml}$  CHX. Numbers refer to relative incorporation levels as measured by densitometric analysis.
- D Yeast cells expressing Ydj1-GFP were analyzed by FCS before (-) or 5 to 10 min after adding a sublethal dose of CHX at 0.2  $\mu\text{g/ml}$  (+). Individual protein diffusion coefficients are plotted ( $N > 50$ ). Mean values (thick lines) and confidence limits for the mean ( $\alpha = 0.05$ , thin lines) are also shown.
- E Ydj1-GFP and GFP mobility assayed by FLIP at the indicated time points after CHX addition at 0.2  $\mu\text{g/ml}$ . Relative mean values and confidence limits ( $\alpha = 0.05$ ) for the mean are shown.
- F Nuclear levels of Cln3-3HA by immunofluorescence before or 60 sec after addition of CHX at 0.2  $\mu\text{g/ml}$ .
- G Nuclear accumulation of Cln3-3HA in asynchronous individual wild type (wt) and Ydj1-deficient (*ydj1*) yeast cells before or at the indicated times after CHX addition as in panel F. Relative mean values ( $N > 200$ ) and confidence limits ( $\alpha = 0.05$ , thin horizontal lines) for the mean are shown.

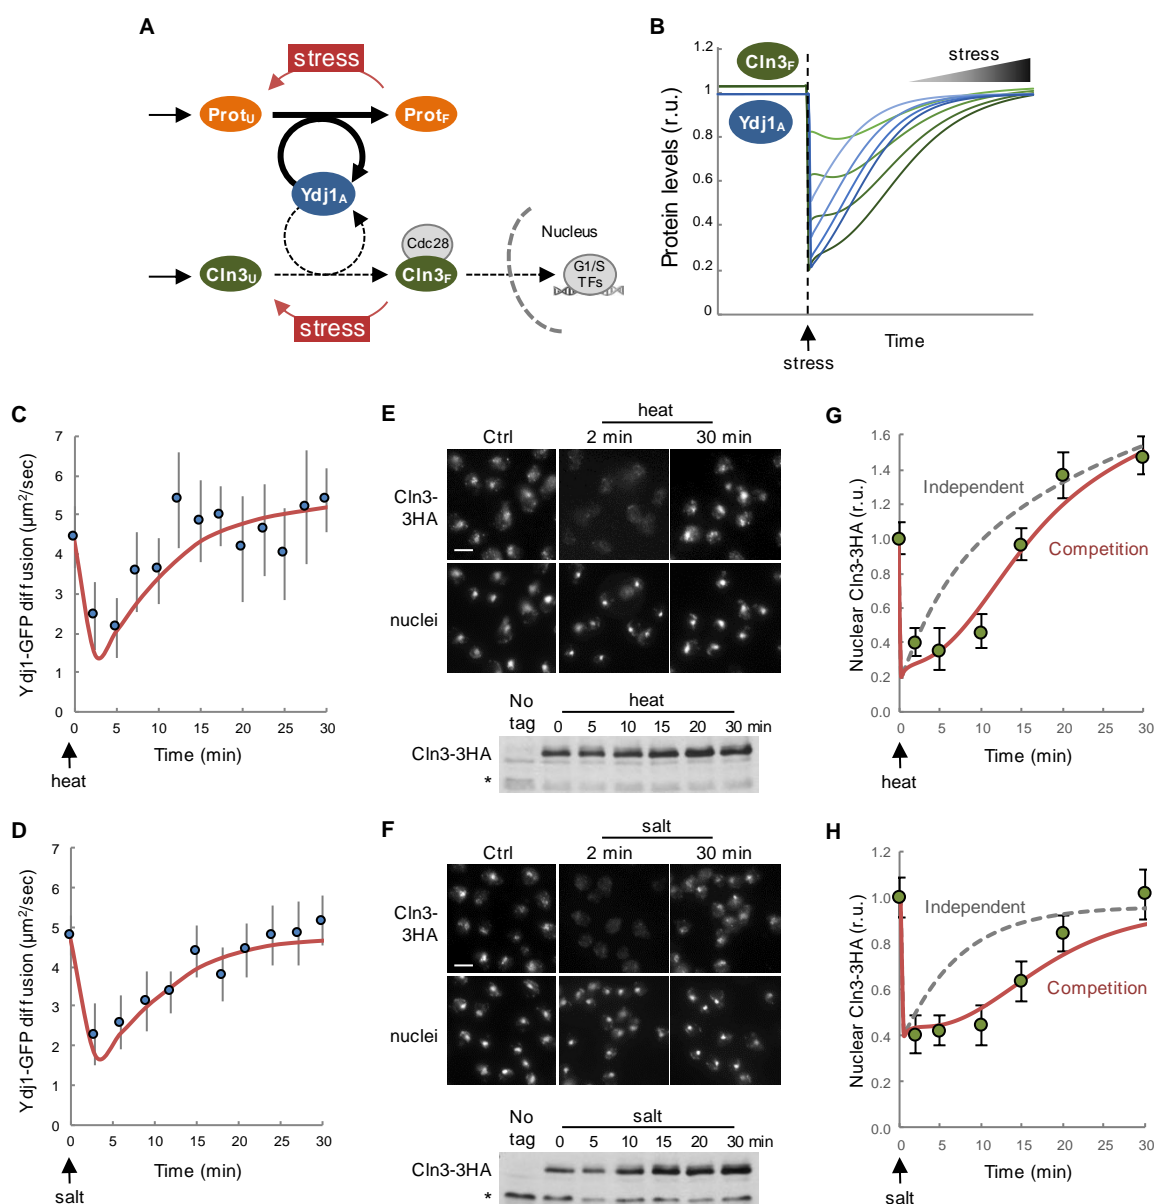

797  
798  
799 **Figure 5. Stress reduces chaperone mobility and hinders nuclear accumulation of Cln3.**  
800 A The competition model predicts that a sudden increase in the level of unfolded proteins ( $Prot_U$ ) would decrease  
801 the level of available chaperone ( $Ydj1_A$ ) and, hence, reduce the level of free Cln3 ( $Cln3_F$ ).  
802 B Prediction of available chaperone ( $Ydj1_A$ ) and free Cln3 ( $Cln3_F$ ) levels as a function of time after stress.  
803 Simulations were produced by using parameter set 3114 and transferring different fractions (20-80%) of folded  
804 protein ( $Prot_F$ ) to the unfolded population ( $Prot_U$ ).  
805 C,D Mean  $Ydj1$ -GFP diffusion coefficients ( $N>20$ , filled circles) and confidence limits ( $\alpha=0.05$ , thin lines) are plotted  
806 at different times during heat (C) or salt (D) stress. Model fits (see text for details) are also shown (orange lines).  
807 E,F Immunofluorescence of Cln3-3HA in late-G1 cells arrested with  $\alpha$  factor during heat (E) and salt (F) stress.  
808 Bottom: Cln3-3HA levels by immunoblotting. A cross-reacting band is shown as loading control.  
809 G,H Nuclear levels of Cln3-3HA quantified from cells during heat (E) and salt (F) stress as in panels E and F. Relative  
810 mean values ( $N>200$ ) and confidence limits ( $\alpha=0.05$ , thin horizontal lines) for the mean are shown. Model  
811 simulations (see text for details) assuming that  $Prot_U$  and  $Cln3_U$  require  $Ydj1_A$  in independent (gray dashed  
812 lines) or competing (solid orange lines) scenarios are also shown.

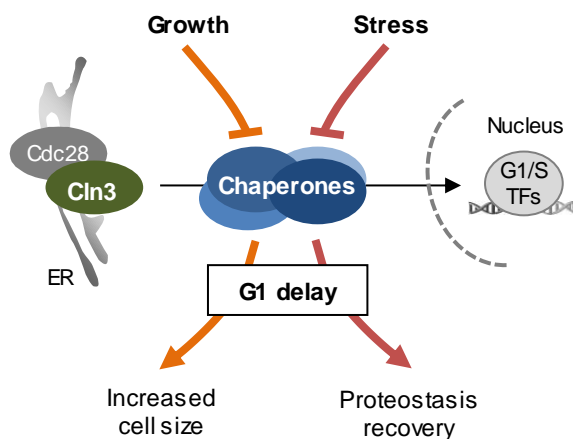

813  
814  
815  
816  
817  
818  
819  
820  
821

**Figure 6. Competition for chaperones and the regulation of cell-cycle entry by growth and stress.**

Chaperone-dependent Cln3 folding and release would act as a key modulator of Start to subordinate cell-cycle entry to growth and stress. By compromising higher levels of chaperones in growth processes, fast growing cells would restrain nuclear accumulation of Cln3 until a larger cell size is attained. On the other hand, stressful conditions would compromise common chaperones and delay Start until normal proteostasis conditions are restored.

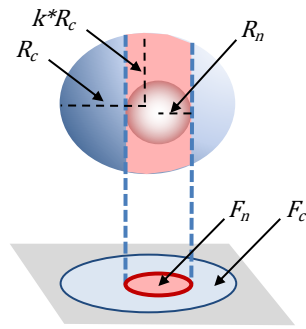

$$N/C = 1 + (F_r - \frac{3}{2}k) / (R_r - F_r \cdot R_r^3)$$

$$R_r = R_n / R_c$$

$$F_r = F_n / F_c$$

$N/C$  – Nuclear to cytoplasmic concentration ratio

$F_n$  – Average fluorescence in nucleus projected area

$F_c$  – Average fluorescence in cell projected area

$R_n$  – Nuclear radius

$R_c$  – Cell radius

$k$  – Correction factor in z axis

822  
823

824 **Figure EV1. Nuclear to cytoplasmic ratios by wide-field fluorescence microscopy.**

825 Fluorescence within the nuclear projected area is influenced by fluorescence levels in both nuclear and cytoplasmic  
826 compartments. Briefly, the nuclear projection collects fluorescence originated from a column defined by the nuclear  
827 diameter and the cell height. Total fluorescence in the column is the weighted sum of nuclear and cytoplasmic  
828 concentrations of fluorophore assuming that the column is a cylinder and the nucleus a sphere with known  
829 dimensions relative to the cell. Cytoplasmic fluorescence (and concentration) is obtained from cell regions outside  
830 the nuclear projection, and the ratio of the nuclear to cytoplasmic concentration of the fluorescent protein is  
831 calculated as  $N/C = 1 + (F_r - \frac{3}{2} * k) / (R_r - F_r * R_r^3)$ , where  $F_r$  is the ratio of average fluorescence signal in  
832 nuclear ( $F_n$ ) and cell ( $F_c$ ) projected areas,  $R_r$  is the ratio of nuclear ( $R_n$ ) and cell ( $R_c$ ) radius, and  $k$  corrects for cell  
833 radius variation in the z axis, which was experimentally obtained from GFP-expressing wild-type cells.  
834

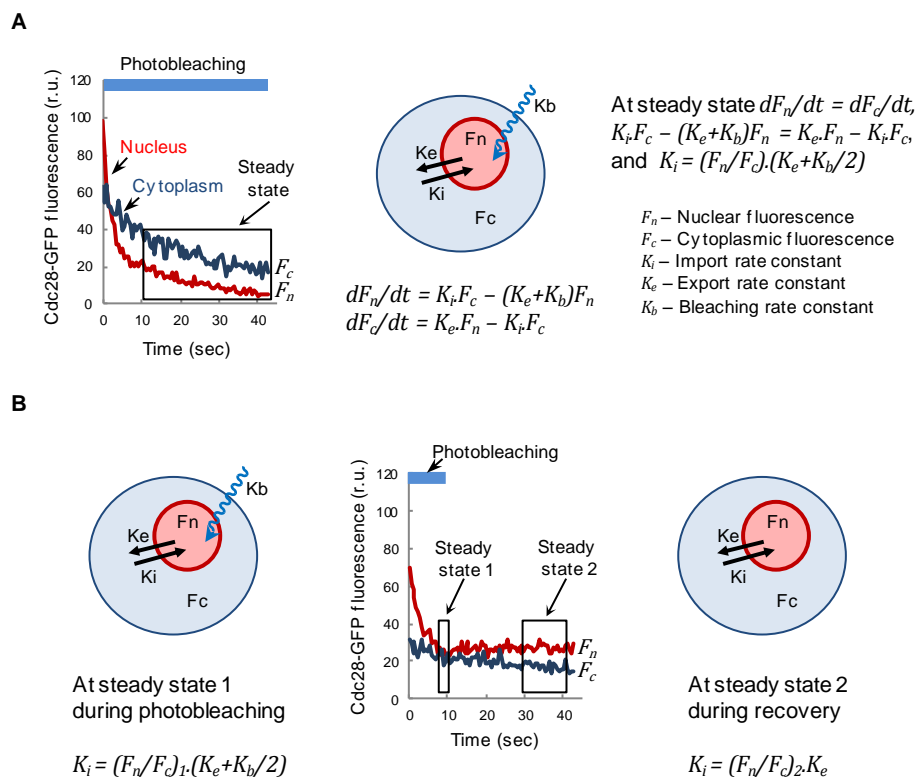

835  
836  
837  
838  
839  
840  
841  
842  
843  
844  
845  
846  
847  
848  
849  
850  
851  
852  
853

**Figure EV2. Nuclear import kinetics analysis by nuclear FLIP.**

- A Schematic showing equations and parameters used to analyze Cdc28-GFP import and export kinetics as described under Materials and Methods. Fluorescence signals within nuclear ( $F_n$ ) and cytoplasmic ( $F_c$ ) areas were used to obtain a nuclear to cytoplasmic ratio ( $F_n/F_c$ ). This ratio dropped to different extents during the first 10 sec of exposure, reflecting a population of Cdc28-GFP molecules in the nucleus not in dynamic equilibrium with the cytoplasm. After this period, however, the ( $F_n/F_c$ ) ratio reached a steady state defined by  $dF_n/dt = dF_c/dt$ , being  $dF_n/dt = K_i F_c - (K_e + K_b) F_n = K_e F_n - K_i F_c$ , where  $K_i$ ,  $K_e$  and  $K_b$  are the import, export and bleaching rate constants, respectively. Thus,  $K_i F_c - (K_e + K_b) F_n = K_e F_n - K_i F_c$ , and  $K_i = (F_n/F_c) (K_e + K_b/2)$ . The bleaching rate constant was obtained from Htb2-mCherry fluorescence loss in the same cell and corrected by a bleaching factor of  $1.94 \pm 0.09$  to account for intrinsic differences in bleaching rates for GFP and mCherry, which was obtained from G1 cells (N=33) under conditions that minimize import contribution (Cln3-deficient cells).
- B Schematic showing equations and parameters used to obtain Cdc28-GFP export kinetics. In this case, the nuclear region of wild-type G1 cells (N=34) was only photobleached for 10 s and allowed to recover fluorescence by nuclear import of Cdc28-GFP.  $F_n/F_c$  ratio steady states were used to calculate import rate constants at photobleaching,  $K_i = (F_n/F_c)_1 \cdot (K_e + K_b/2)$ , and recovery,  $K_i = (F_n/F_c)_2 \cdot K_e$ , to finally obtain the export rate constant  $K_e = 0.199 \pm 0.020$ .

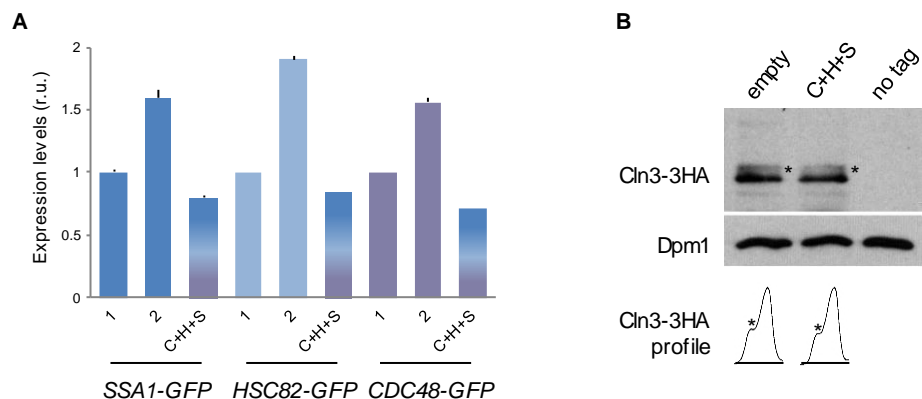

854  
855  
856 **Figure EV3. Gene dosage and expression levels of GFP-fused chaperones and Cln3-3HA.**  
857 A Expression levels of the indicated chaperones endogenously expressed as GFP fusions in single (1) or double (2)  
858 copy, or in single copy and the presence of untagged-chaperone expressing vectors (C+H+S) as in Fig 2A.  
859 Fluorescence levels were determined and made relative to the mean value for cells containing a single copy of  
860 the indicated chaperone gene. Mean values (N>500) and confidence limits ( $\alpha=0.05$ , thin vertical lines) for the  
861 mean are plotted.  
862 B Immunoblot analysis of endogenously expressed Cln3-3HA levels from cells containing empty or chaperone  
863 expressing vectors as in Fig 2A. A Dpm1 immunoblot is shown as loading control. Densitometric profiles of the  
864 corresponding lanes are shown for direct assessment of total levels and phosphorylated (\*) status.  
865  
866



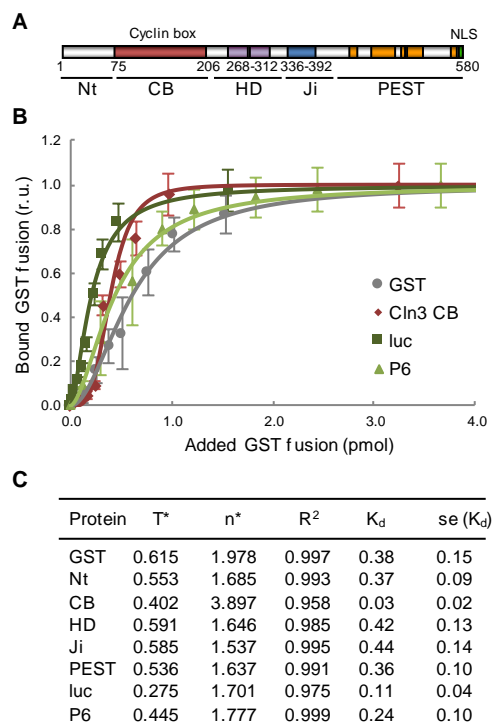

867  
868  
869  
870  
871  
872  
873  
874  
875  
876  
877  
878

**Figure EV4. Ydj1 binding affinity to Cln3 and reference proteins.**

- A Cln3 scheme indicating the N-terminal domain (N<sub>t</sub>), the cyclin box (CB), a hydrophobic bi-partite domain (HD), the inhibitory J domain (J<sub>i</sub>), the C-terminal PEST rich region and the nuclear localization signal (NLS).
- B Binding efficiencies of increasing amounts (0-4 pmol) of the referred GST fusions to Ydj1 (1 pmol). Luciferase (luc) and P6, a selected Ydj1-target peptide, were used as references. Mean relative bound levels (N=3) and standard deviations are plotted.
- C Binding parameters of Ydj1 to the referred GST fusions in assays as in panel B. A simultaneous mode of binding was assumed for fitting the Hill equation,  $y = x^n / (T^n + x^n)$ . Obtained parameters and the resulting dissociation constant ( $K_d = T^n$ ) are shown.

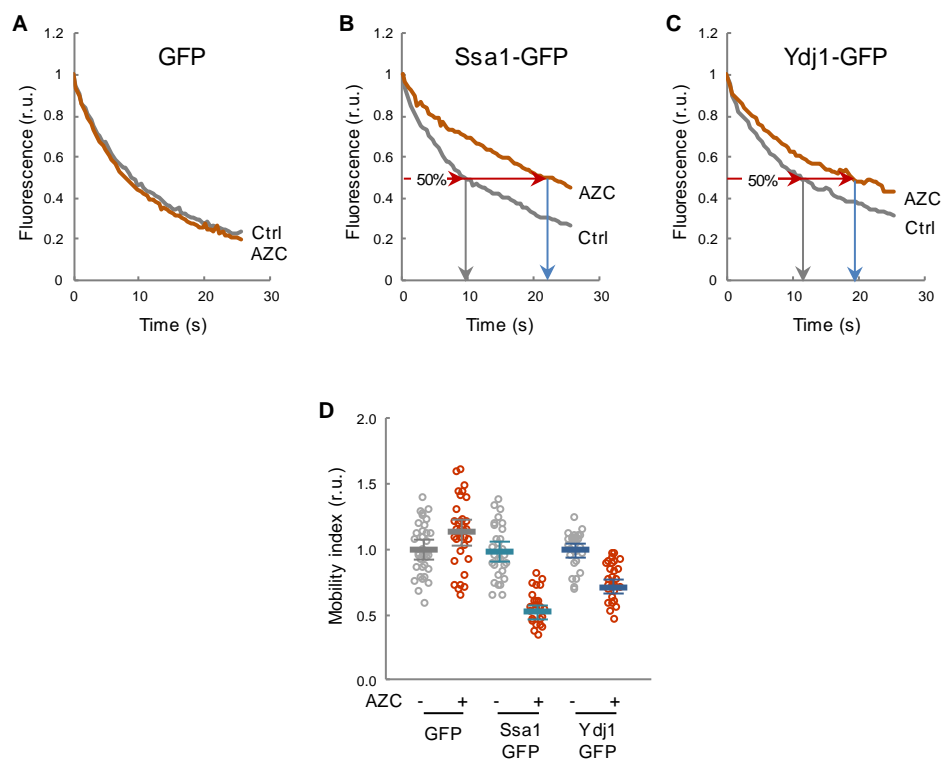

879  
880  
881  
882  
883  
884  
885  
886  
887  
888  
889  
890  
891

**Figure EV5. Mobility of GFP-fusion proteins as a reporter of chaperone availability.**

A-C Yeast cells expressing the indicated GFP fusions were analyzed by confocal microscopy to quantify intracellular mobility of Ssa1 and Ydj1 chaperones in the presence or absence of AZC. Since AZC-containing proteins accumulate with chaperones into disperse cellular aggregates (Escusa-Toret *et al*, 2013), FLIP was used to include both soluble and aggregated forms of these chaperones in the analysis. Representative fluorescence decay curves of individual cells are plotted.

D Individual protein mobility values ( $N > 25$ ) of Ssa1- and Ydj1-GFP fusions obtained by FLIP before (-) or 15 min after adding AZC (+) are plotted. Mean values (thick lines) and confidence limits for the mean ( $\alpha = 0.05$ , thin lines) are also shown.

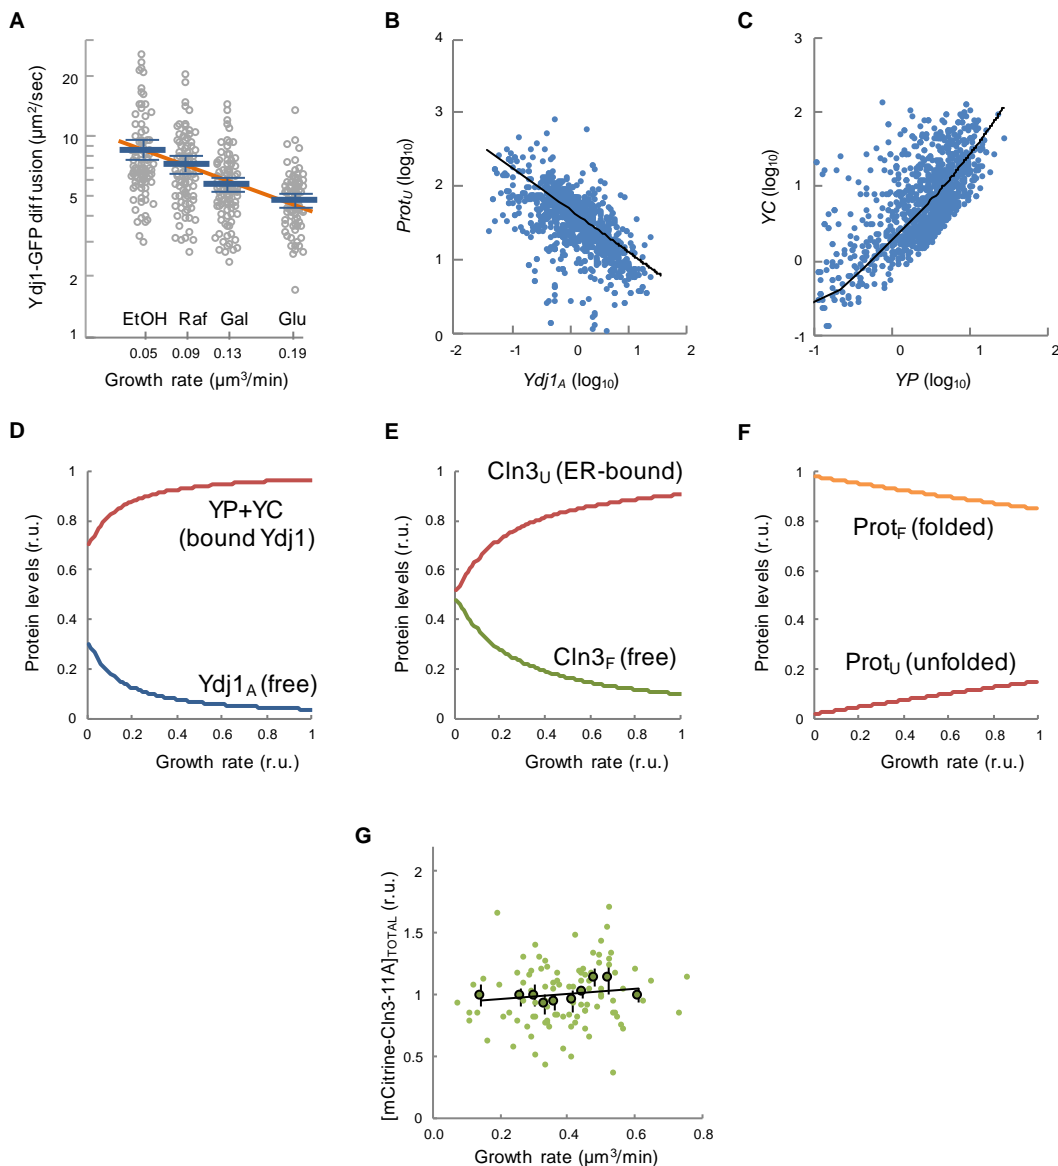

892  
 893  
 894 **Figure EV6. Ydj1-GFP mobility as a function of growth rate and correlation of state variables.**  
 895 A Ydj1-GFP diffusion assayed by FCS in cells growing at different population growth rates in the indicated carbon  
 896 sources. Individual diffusion coefficients, mean values (N=90, thick blue lines), confidence limits for the mean  
 897 ( $\alpha=0.05$ , thin lines), and a linear fit (thick orange line) are plotted.  
 898 B-C Covariation plots of  $Prot_U$  vs  $Ydj1_A$  (C), and  $YC$  vs  $YP$  (D) are shown. Values were obtained from parameters sets  
 899 in Fig 3B and plotted in log space with the corresponding regression lines.  
 900 D-F Prediction of main variables of the model as a function of growth rate. Parameter set 3114 was used to  
 901 simulate relative levels of protein-bound ( $YC$  and  $YP$ ) and available ( $Ydj1_A$ ) chaperone (D), unfolded ER-bound  
 902 ( $Cln3_U$ ) and free folded ( $Cln3_F$ ) G1 cyclin (E), and all other unfolded ( $Prot_U$ ) and folded ( $Prot_F$ ) proteins (F).  
 903 G Cells (N=100) were analyzed to obtain the mean cellular concentration of mCitrine-Cln3-11A during G1. Single-  
 904 cell (small circles) or binned data (large circles, 10 cells/bin) by growth rate are plotted. Confidence limits  
 905 ( $\alpha=0.05$ ) and a linear regression line for binned data are also plotted.  
 906  
 907

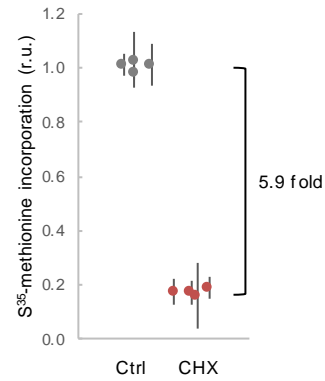

908  
909  
910  
911  
912  
913  
914

**Figure EV7. Protein synthesis effects by CHX at a sublethal dose.**

Protein synthesis as measured by  $S^{35}$ -methionine incorporation in live cells in the absence or presence of 0.2  $\mu\text{g/ml}$  CHX. Relative mean values (circles) of triplicate measurements from independent cell batches ( $N=4$ ) and confidence limits for the mean ( $\alpha=0.05$ , thin lines) are plotted.

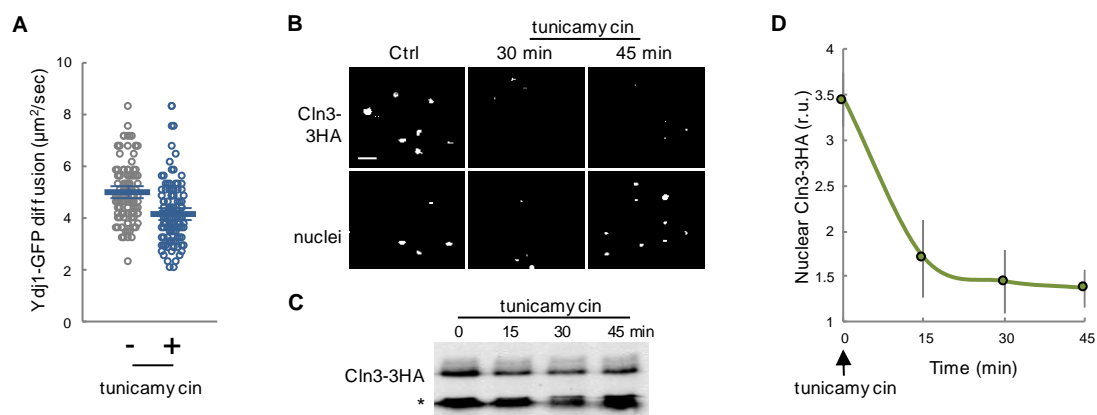

915  
916  
917 **Figure EV8. Effects of ER stress on Ydj1-GFP mobility and Cln3-3HA nuclear levels.**  
918 A Yeast cells expressing Ydj1-GFP were analyzed by FCS 30 min after adding tunicamycin to 1  $\mu\text{g}/\text{ml}$ . Individual  
919 protein diffusion coefficients are plotted ( $N>20$ ). Mean values (thick lines) and confidence limits for the mean  
920 ( $\alpha=0.05$ , thin lines) are also shown.  
921 B Immunofluorescence of Cln3-3HA in late-G1 cells arrested with  $\alpha$  factor 30 min after 1  $\mu\text{g}/\text{ml}$  tunicamycin  
922 addition. Bottom: Cln3-3HA levels by immunoblotting at different times in the presence of tunicamycin. A cross-  
923 reacting band is shown as loading control.  
924 C Nuclear levels of Cln3-3HA quantified from cells during treatment with tunicamycin as in panel B. Relative  
925 mean values ( $N>200$ ) and confidence limits ( $\alpha=0.05$ , thin horizontal lines) for the mean are shown.  
926

927 **Supplementary Table 1. Yeast strains and plasmids.**

| Yeast strains                                                                    |                               |
|----------------------------------------------------------------------------------|-------------------------------|
| CML128 ( <i>MATa leu2-3,112 ura3-52 trp1-1 his4-1 can'</i> )                     | Gallego <i>et al</i> , 1997   |
| CML203 ( <i>CLN3-3HA::GEN</i> )                                                  | Gallego <i>et al</i> , 1997   |
| CYC038 ( <i>cln3::GEN</i> )                                                      | This study                    |
| CYC216 ( <i>CDC28-sGFP::GEN tTA::LEU2</i> )                                      | Wang <i>et al</i> , 2004      |
| CYC228 ( <i>CDC28-sGFP::GEN cln3::LEU2</i> )                                     | Wang <i>et al</i> , 2004      |
| MAG261 ( <i>YDJ1-sGFP-FS::HIS3</i> )                                             | This study                    |
| MAG676 ( <i>SSA1-sGFP::HIS3</i> )                                                | This study                    |
| MAG713 ( <i>whi7::GEN</i> )                                                      | This study                    |
| MAG716 ( <i>cln3::GEN whi5::NAT stb1::HYG</i> )                                  | This study                    |
| MAG1086 ( <i>CDC28-sGFP::GEN GAL4-ER-VP16::URA3</i> )                            | This study                    |
| MAG1092 ( <i>CDC28-sGFP::GEN WHI5-mCherry::HYG</i> )                             | This study                    |
| MAG1512 ( <i>TEF1<sub>p</sub>-mCherry::NAT</i> )                                 | This study                    |
| MAG1533 ( <i>CDC28-sGFP::GEN ydj1::NAT</i> )                                     | This study                    |
| MAG1911 ( <i>TEF1<sub>p</sub>-mCherry::NAT SSA1-sGFP::GEN</i> )                  | This study                    |
| MAG1913 ( <i>TEF1<sub>p</sub>-mCherry::NAT CDC48-sGFP::GEN</i> )                 | This study                    |
| MAG1919 ( <i>TEF1<sub>p</sub>-mCherry::NAT HSC82-sGFP::GEN</i> )                 | This study                    |
| KSY083-5 ( <i>mCitrine-CLN3-11A::NAT</i> )                                       | Schmoller <i>et al</i> , 2015 |
| MAG1306 ( <i>mCitrine-CLN3-11A::NAT ydj1::GEN</i> )                              | This study                    |
| MAG1334 ( <i>mCitrine-CLN3-11A::NAT HTB2-mCherry::HYG</i> )                      | This study                    |
| Plasmids                                                                         |                               |
| pGEX-KG ( <i>tac<sub>p</sub>-GST</i> )                                           | ATCC77103                     |
| pMAG85 ( <i>tac<sub>p</sub>-GST-CLN3<sup>1-75aa</sup></i> )                      | This study                    |
| pMAG87 ( <i>tac<sub>p</sub>-GST-CLN3<sup>70-220aa</sup></i> )                    | This study                    |
| pMAG89 ( <i>tac<sub>p</sub>-GST-CLN3<sup>215-320aa</sup></i> )                   | This study                    |
| pMAG91 ( <i>tac<sub>p</sub>-GST-CLN3<sup>315-420aa</sup></i> )                   | This study                    |
| pMAG93 ( <i>tac<sub>p</sub>-GST-CLN3<sup>415-580aa</sup></i> )                   | This study                    |
| pMAG155 ( <i>tac<sub>p</sub>-GST-luc</i> )                                       | This study                    |
| pMAG157 ( <i>tac<sub>p</sub>-GST-P6</i> )                                        | This study                    |
| pMAG144 ( <i>ARS-CEN URA3 HSC82 CDC37</i> )                                      | This study                    |
| pMAG146 ( <i>ARS-CEN LEU2 SSA1 YDJ1</i> )                                        | This study                    |
| pMAG149 ( <i>ARS-CEN TRP1 CDC48 UFD1 NPL4</i> )                                  | This study                    |
| pMAG438 ( <i>ARS-CEN 2xTEL URA3 TRP1 HSC82 CDC37 SSA1 YDJ1 CDC48 UFD1 NPL4</i> ) | This study                    |
| pMAG469 ( <i>ARS-CEN LEU2 GAL1<sub>p</sub>-SSA1 GAL10<sub>p</sub>-YDJ1</i> )     | This study                    |
| pMAG1228 ( <i>ARS-CEN URA3 TEF1<sub>p</sub>-sGFP</i> )                           | This study                    |
| pMAG1915 ( <i>ARS-CEN LEU2 SSA1-sGFP</i> )                                       | This study                    |
| pMAG1917 ( <i>ARS-CEN TRP1 CDC48-sGFP</i> )                                      | This study                    |
| pMAG1920 ( <i>ARS-CEN URA3 HSC82-sGFP</i> )                                      | This study                    |

928
